## **Intron retention can be an excellent marker for evaluating the depressed state and useful for discovering new pathways in the recovery of depression by a drug.**

Norihiro Okada<sup>a#</sup>, Kenshiro Oshima<sup>a</sup>, Akiko Maruko<sup>a</sup>, Mariko Sekine<sup>c</sup>, Naoki Ito<sup>a</sup>, Akino Wakasugi<sup>c</sup>, Eiko Mori<sup>b</sup>, Hiroshi Odaguchi<sup>b</sup> and Yoshinori Kobayashi<sup>a</sup>

<sup>a</sup> School of Pharmacy, Kitasato University, 5-9-1 Shirokane, Minato-ku, Tokyo 108-8642, Japan

<sup>b</sup> Oriental Medicine Research Center, School of Pharmacy, Kitasato University, 5-9-1 Shirokane, Minato-ku, Tokyo 108-8642, Japan

<sup>c</sup> Kitasato University Kitasato Institute Hospital, 5-9-1 Shirokane, Minato-ku, Tokyo 108-8642, Japan

#Corresponding author

### **Abstract**

**BACKGROUND:** Peripheral inflammation is often associated with depressive disorders, and immunological biomarkers of depression remain a focus of investigation.

**METHODS:** We performed RNA-seq analysis of human peripheral blood mononuclear cell (PBMC) RNA transcripts from a case-control study including subjects with self-reported depression in the pre-symptomatic state of major depressive disorder (MDD), and analysed differential expression of genes (DEGs) and intron retention (IR) using rMats.

**RESULTS:** Among the DEGs with a statistically significant value, both 651 up-regulated and 820 down-regulated genes were enriched in GO (gene ontology) terms of innate and adaptive immunity. The former was particularly enriched in bacterial infection and phagocytosis, while the latter was enriched in genes related to antigen presentation and T cell proliferation and maturation. Genes with the 158 increased and 211 decreased IRs (termed IncIR and DecIR genes, respectively) in the depressed subjects were analysed. Their GO terms were very similar to those of the up- and down-regulated genes, with an emphasis on ciliary assembly and function in the DecIR. The results also showed that a Japanese herbal medicine partially reversed the depression in these subjects after recovering the DecIR and IncIR genes. By imposing the recovered genes on the network of depressed subjects, several new pathways for recovery from depression were successfully discovered.

**CONCLUSION:** Depression was associated with activation of the innate immune response and relative inactivation of T cell signalling. DEGs reflect physiological demands at the transcriptional level, whereas IRs are a mechanism for fine-tuning cytoplasmic homeostasis. Accordingly, IR is a stress response and IR genes are sensors of the physiological state in the

cytoplasm. In particular, where ciliary genes were detected by IR analysis, it is expected that there is a defect in ciliary function or immune synaptogenesis in depression. We demonstrate the potential of IR biomarkers in the immunological stratification of depressed patients and their utility in the discovery of novel pathways involved in recovery from depression.

## **Introduction**

In 2017, it was estimated that more than 320 million people worldwide were affected by clinical depression (1). It is likely that this number - along with the number of people affected by other mental disorders - is increasing as the stresses of everyday life continue to rise, particularly since the outbreak of COVID-19. In fact, depression has become the leading cause of disability worldwide. Major depressive disorder (MDD) is often accompanied by anxiety disorder, which is also the leading cause of death by suicide (1). Currently, there is no reliable laboratory test or effective treatment strategy to diagnose or cure MDD. Another important issue in depression is the low remission rate, with only about half of patients achieving complete remission and the remission rate decreasing with each subsequent treatment. Therefore, to better understand the pathogenesis of depression and its aetiology, there is an urgent need to identify biomarkers for monitoring treatment outcome and genes that can be targeted for drug therapy (2, 3, 4, 5, 6).

There is increasing evidence that depression and inflammation are often associated (7, 8, 9, 10, 11, 12, 13, 14). Several case-control studies of major depressive disorder (MDD) have reported elevated peripheral blood levels of inflammatory cytokines such as CRP, interleukin 6 and tumour necrosis factor in MDD (15, 16, 17). In these cases, where inflammation occurs first and depressive symptoms appear later, the view that inflammation is the cause of depression is gaining ground. Furthermore, the prevalence of comorbid depression is increased in many non-psychotic inflammatory diseases, such as rheumatoid arthritis (18), suggesting a possible causal role of inflammation in depression. Ed. Bullmore (in his excellent book "THE INFLAMED MIND"(19)) has proposed that stress causes inflammation and that inflammation causes depression. Much of the current data seems to be consistent with his proposal (20).

Alternative pre-mRNA splicing is a mechanism by which multiple protein isoforms can be produced from a single gene transcript. One type of alternative splicing is termed 'intron retention' (IR), which was previously thought to simply reflect one or more errors during pre-mRNA splicing. More recently, however, IR has been considered to be a biologically meaningful phenomenon rather than an alternative splicing error, because an increase or decrease in the number of introns has been associated with certain biological phenomena, such as cell differentiation (21, 22, 23, 24), ageing (25) and oncogenesis (26). Using mouse models

of ageing such as Klotho mice (27) and SAMP8 mice (28), we have previously shown that IR occurs as a stress response in the pre-symptomatic state and that when the state is restored by administration of the Japanese herbal medicine, the incidence of IR is restored to that of the healthy state (27, 28). In addition, we have proposed that genes affected by IR (termed IR genes) play a sensor role in detecting perturbations in cellular homeostasis (29).

We hypothesised that by analysing the IR genes, it would be possible to identify the stresses experienced by patients and the gene dysfunctions that are hidden as causes of their depression. In other words, we wanted to explore the possibility of using IR as a means of investigating aetiology.

## **Materials and Methods**

### **Ethics declarations, ethics approval and consent to participate.**

This research has been reviewed by the Kitasato Institute Hospital, Research Ethics Committee and assigned research number 21037. Please note that the Kitasato Institute Hospital, Research Ethics Committee deliberates in accordance with the Ethical Guidelines for Medical and Health Research Involving Human Subjects. Other documents were prepared in accordance with the guidelines, and the study was initiated. All subjects who participated in the study gave their written consent to the research procedures, including genetic analysis. The research procedures were conducted in accordance with the research protocol.

### **Subjects**

We recruited subjects with depressive symptoms who had consented to participate in the "Study of Hangekobokuto (30) and the Intestinal Environment" conducted by the Kitasato University Oriental Medicine Research Center, and who scored between 6 and 20 on the Brief Depressive Symptom Scale (QIDS-J). After the benefits and risks of the study were explained to the subjects, written informed consent was obtained, and the following exclusion criteria were applied to those who consented. 1) Subjects already receiving treatment for depression, 2) Subjects who had taken herbal medicinal preparations within the previous 4 weeks, 3) Subjects who had taken antibiotics within the previous 4 weeks, 4) Subjects who were clearly in need of Western medical treatment, 5) Subjects who had been diagnosed with ulcerative colitis or Crohn's disease, 6) subjects with clinically significant hepatic or renal impairment, 7) subjects who have participated in other clinical studies within the past 12 weeks, and 8) subjects who are deemed by the investigator to be unsuitable for the study.

Subjects took a daily dose of a Japanese herbal medicine, Hangekobokuto (HKT), at home. The BDI™-II Beck Depression Questionnaire (BDI-II) was administered at the time of the

screening test and at hospital visits 2 months after taking HKT, and blood was collected using BD Vacutainer CPTTM Blood Collection Tubes (Nippon Becton Dickinson, Japan). Subjects were classified according to their BDI-II scores, with 6 control subjects (CON) scoring less than 16 and 8 subjects with depression symptoms (before medical treatment (BMT) and after medical treatment (AMT)) scoring 17 or higher.

### **Japanese herbal medicine**

Japanese herbal medicines originated in ancient China and are widely used in Japan for a variety of conditions (31, 32). HKT (30) is one of the formulations and is taken for symptoms of mental anxiety, stagnant gas in the stomach and usually poor digestive function. In this study, HKT was used as a decoction in the following proportions, based on the formula of the Kitasato University Oriental Medicine Research Centre: Hange (Pinelliae Tuber) 6.0 g; Bukuryo (Hoelen) 5.0 g; Koboku (Magnoliae Cortex) 3.0 g, Shiso (Perillae Herba) 2.0 g; Syokyo (Zingiberis Rhizoma) 0.5 g.

### **PBMCs preparation, RNA extraction, RNA library preparation and RNA-sequencing**

Blood samples collected in BD Vacutainer CPTTM Blood Collection Tubes are centrifuged within 2 hours to separate the PBMC layer. After centrifugation, PBMC samples can be stored and transported at -80 °C. RNA extraction was performed on individual PBMC samples. Library construction and paired-end sequencing (150 base pairs × 2) using the NovaSeq 6000 platform (Illumina) were outsourced to Azenta Life Sciences, Tokyo, Japan. RNA sequencing yielded 109 ~ 148 million (× 2, paired-ends) raw reads per sample. These were then purified using conventional procedures (33, 34, 35, 36).

### **Differential expressed genes (DEG) analysis**

Using the edgeR package in R, significantly differentially expressed genes were detected by performing likelihood ratio tests. The results showed that 922 downregulated and 641 upregulated genes were significantly differentially expressed between the 6 CONs and 8 BMTs with  $P < 0.05$  and fold-change  $> 1.2$ . DEGs were used for GO and KEGG pathway enrichment analysis using the DAVID website. Similarly, the same test was calculated under the same conditions between BMT and AMT to investigate the effect of HKT administration.

### **Detection of intron retentions**

IR-containing genes were analysed to determine their possible role in stress sensing as proposed in the previous study (27, 28, 29). rMATS v4.1. was used to assess the differential IR landscape embedded in the RNA-seq data. The optional parameters for the rMATS program are as follows:

[--cstat 0.05 -t paired --readLength 150 --variable-read-length]. A cut-off of  $P < 0.05$  in the likelihood ratio test and an absolute difference of the IR ratio  $> 0.05$ , used as the statistical significance test in the rMATS program, was used to call differential IR events. Similarly, the same test was calculated under the same conditions between BMT and AMT to study the effect of HKT administration.

### **Interactome analysis**

A protein-protein interaction network was generated using Cytoscape ver. 3.9.1 with StringApp version 1.7.1. The network type "full STRING network" was selected for drawing and a confidence (score) cut-off value of 0.7 was used (Other parameters were used as default values.). Fig. 5 was calculated with a confidence (score) cut-off value of 0.7 using proteins encoded by IR genes and DEGs, and we analysed protein-protein interactions with each functional gene group, cilia-related genes (proteins), psychiatric disorders-relevant (PD) genes (proteins), adaptive and innate immunity related genes (proteins).

## **Results**

### **RNA-seq and analysis of DEG.**

The study included a group of subjects with depression ranging from 17 to 27 on the BDI-II score, designated as BMT group (8 individuals), which is neither severe nor mild. Relatively mild subjects with scores ranging from 7 to 16 were used as controls, designated as CON group (6 individuals), and healthy subjects were not used as controls (Figure 1A(i)(ii)). As we are all on the spectrum, we wanted to gain molecular insight into the transition from mild to moderate depression. All subjects were also screened to ensure that they had not taken any medication or been hospitalised during the three-month period before examination (see details in the method section). These are the characteristics of subjects in this study. PBMC and RNA were isolated from each sample and used for RNA-seq. DEG analysis resulted in the identification of 651 upregulated and 820 downregulated genes for the BMT group compared to the CON group (Figure 1BC, Supplementary Table 1). GO enrichment analysis was performed for upregulated genes (Figure 1D, Supplementary Figure 1), showing enrichment for innate immunity-related terms such as infection, phagocytosis and inflammation as well as adaptive immunity, and for downregulated genes (Figure 1E, Supplementary Figure 2), showing enrichment for adaptive immunity-related terms such as antigen presentation, T cell activation as well as synapse-related terms. Figure 1B shows the genes involved in positive regulation of T cell activation (5 genes in Figure 1E) from the downregulated genes and the genes involved in innate immune responses (21 genes in Figure 1D) from the upregulated genes, which include a large number of

immunoglobulin heavy chains (37, 38), suggesting an inflammatory phenotype of the subjects (37).

### **Identification of IncIR and DecIR genes in the depressed subjects.**

Since IR is a stress response and genes susceptible to IR are a physiological sensor ((27, 28); see later), we characterised genes for increased intron (IncIR) and those for decreased intron (DecIR) in depressed subjects, considering that such an analysis would give an indication of the type of stress to which the subjects were exposed. The 158 IncIR and 198 DecIR genes were isolated (Figure 2AB, Supplementary Table 2) and their characteristics were first studied from the literature. As expected, many sensor or regulatory genes were isolated from the protein-coding IR genes, some of which are shown in Table 1 (45 genes). This is only half of the genes identified as sensors, regulators and modulators among the IR genes in this analysis, in which genes controlling inflammation, innate immunity and adaptive immunity were found. Their GO enrichments were then analysed, as shown in Figure 2CD. In IncIR, TNF signalling pathway and several terms related to innate immune response were enriched, and in DecIR genes, T cell signalling and other adaptive immune response as well as inflammation and innate immune processes were enriched. In short, both innate and adaptive immunity were highlighted in the IR analysis, as in the case of the DEG analysis, suggesting that IR genes are mirrored by DEG genes. The important difference between IR genes and DEG genes is that immunoglobulin was included in the DEG list (in fact, almost half of the upregulated genes in our RNA-seq analysis are immunoglobulin genes, see Supplementary Figure 1), but not in the IR genes. The reason why immunoglobulin genes were not listed in the IR genes is discussed later. Most interestingly, the highest enrichment score of genes in DecIR was for cilium assembly, suggesting that cilium is involved in sensing depressive stress in these subjects (see Discussion).

### **IR genes statistically significantly interact with those for innate immune response.**

To characterise the IR genes in more detail, we first determined the possible overlap of IR genes with immune-related genes, cilia genes and psychiatric disease-related genes (PD genes) using a Venn diagram (Figure 3AB). Among the 317 IR genes (Supplementary Table 2), 32 cilia genes (Figure 3C) and 34 immune-related genes (Figure 3D) were included. Since many IR genes in Table 1 were involved in innate immunity, including viral and bacterial infection, we next examined whether IR genes could specifically interact with genes involved in the innate immune response (Figure 3E). Compared to the interaction of randomly chosen genes, IR genes interact with genes involved in innate immunity in a statistically significant manner. Figure 3F

shows the ranking of the IR gene interactions. Among the IR genes, the *STAT1* gene, signal transducer and activation of transcription gene 1 ((39); Table 1), has the highest number of interactions with innate immunity genes. It is interesting to note that this gene is an important member of the JAK-STAT pathway (39), which is involved in both innate and adaptive immunity including inflammation (see Discussion).

We also looked at the interaction of IR genes with genes involved in leukocyte activation (adaptive immunity) or immune response. Their ranking of IR gene interaction was informative (Figure 3JK), as *STAT1* ranked highest in both cases.

### **IR-DEG interactome**

Using all the protein-coding genes of DEG (285 up-regulated + 433 down-regulated) and IR (127 IncIR + 169 DecIR + 8 Mixed), we can create a large interactome using the PPI network software (Figure 4A). A large interactome was formed, with many hub genes connecting to other genes (Supplementary Table 3). The largest hub is the *SRC* gene (40), one of the DEGs, connected to 43 genes (Figure 4B). Among the IR genes, the largest hub was *DLG4* (41), which is involved in synaptic function. The second was *STAT1*, a member of the JAK-STAT pathway (39). The third and fifth were integrin genes (42, 43), and the fourth was HLA-A (44), which is involved in antigen presentation. The sixth was MYH10 (45), myosin heavy chain, which has 11 links, one of which was linked to myosin light chain kinase (MYLK) (46, 47) and was restored by the administration of Japanese herbal medicine (see later).

### **Recovery of IR genes by administration of HKT**

After 2 months of HKT, PMBC were isolated from the subjects and RNA-seq was performed (Figure 1A). We characterised two types of IR gene recovery, reverse V-shaped recovery (Figure 5A) and V-shaped recovery (Figure 5B), consisting of 30 and 34 protein-coding genes, respectively (Supplementary Table 4). Since only 17 genes (7 V-shaped genes and 10 reverse V-shaped genes) were recovered in DEG (data not shown), the fact that four times as many genes were recovered in IR suggests that IR is superior to DEG as a marker for evaluating the efficacy of a drug in the present case.

Characterisation of the IR genes restored by HKT (Figure 5C) showed that inflammation-related genes were the major restored IR genes (24 genes; 37.5%), with 7 mitochondria-related and 7 cilia-related genes each accounting for 10.9%. The anti-inflammatory effect shown here is consistent with the reported efficacy of many Japanese herbal medicines (31), including HKT (30). Interestingly, while HKT has been reported to have

anti-inflammatory effects by reducing inducible nitric oxide synthase (iNOS), the IR of *NOSIP* (48), which has been reported as a modulator of NO, was consistently restored in the present study. The appearance of haemopoietic genes (3 genes) may also indicate that inflammation and haemopoiesis are linked in a compensatory way, as inflammation consumes a large number of macrophages. Oxidative stress is common in depressed patients (49) and can lead to increased DNA damage together with mitochondrial dysfunction (49). The restoration of these genes may be the hallmark of this herbal medicine.

### **Pathways recovered by herbal medicine can be characterized from the DEG-IR interactome.**

The recovered 64 IR genes shown in Figure 5 and 17 DEGs were superimposed on the DEG-IR interactome (shown in Figure 4) to determine whether these recovered genes can network with each other. Ten new pathways were found (Figure 6). Some of these pathways are known to have protein-protein interactions, but to our knowledge this is the first time that these pathways have been shown to be involved in restoring a physiological state. As the DEG-IR interactome was generated without the use of herbal medicines, different new pathways would be found if different medicines were used in the same patient. This means that this method can be used to discover new pathways involved in the mechanism of action of drugs.

### **Discussion**

The upregulated genes in this study were significantly enriched in GO terms associated with innate and adaptive immunity. Many of these genes (approximately 50%) were related to immunoglobulin heavy chains (Figure 1B, Supplementary Table 1). In contrast, downregulated genes were enriched in GO terms associated with antigen presentation, T cell function and adaptive immunity. This trend in depressed patients has been reported previously (3, 4).

An important aspect of our study is that we have shown that IR can be used as an alternative method to detect specific changes in depression, in addition to traditional DEG methods. Roughly speaking, GOs detected in IncIR genes correspond to GOs of upregulated DEGs, whereas GOs detected in DecIR genes correspond to GOs of downregulated DEGs. This correspondence can be better understood in the light of our recently proposed intron fine-tuning model (29). That is, an increase in introns leads to a decrease in the amount of mature cytoplasmic mRNA (and thus a decrease in cytoplasmic protein), whereas a decrease in introns leads to an increase in mature cytoplasmic mRNA (and thus an increase in cytoplasmic protein). In other words, IR is thought to play a role in regulating the correct amount of protein in the



cytoplasm. This is the molecular mechanism by which intracellular homeostasis is regulated.

As can be easily imagined from the model described above, genes that cause IR have a sensor role. Indeed, many of the IR genes analysed in this study have the word 'sensor' or 'regulate' in their title of the literature to describe their role (Table 1). Analysis of IR genes may reveal new, as yet unidentified, regulatory roles of these genes in the stress of depression.

In many cases, IR genes do not correspond to DEGs. Of the 30 DEGs shown in Figure 1B, only one gene, *HLA-DRB1* (50), is actually subject to IR. DEGs are often quantitative, whereas IR genes are more qualitative. By analogy, the DEG is the soldier, the manual worker, whereas the IR genes is the commander in chief. A typical example of the qualitative difference between DEGs and IR genes is secreted proteins, where secreted proteins are sometimes detected as DEGs (indeed, half of the upregulated genes are immunoglobulins; Supplementary Figure 1), but not as IR genes. This is because these proteins are secreted out of the cell via the Golgi apparatus and are therefore not captured by the homeostasis detection mechanism in the cytoplasm.

There are 20-30,000 genes in the genome, some of which may have a predetermined role as commanders in causing IR. Indeed, in budding yeast, introns have been shown to play a mediator role in monitoring the physiological state of the cell (51, 52). Thus, the function of IRs as sensors described here is likely to be an evolutionarily conserved universal function. It remains to be seen by what mechanism this particular intron reflects physiological states and is involved in cellular homeostasis (29), which is a major challenge for the future.

Many researchers have analysed DEGs between case-controls to look for markers of depression. What has been found is that even when the top 10 genes with the highest expression variability are examined, the data differ from experiment to experiment and do not match (53). As shown in the current study, IR variation is likely to be more sensitive as a marker of depression. Consider this in practice: a 10% fluctuation in immunoglobulin levels in DEG would not represent the physiological state of many individuals, but a 10% reduction in the intron of the inflammation sensor *STAT1* (39) would have a significant impact on immune homeostasis because it would increase the amount of STAT1 protein in the cytosol by 10%. The accumulation of various studies to date suggests that the cause of depression is polygenic (54), but it is more plausible that the reason why genes for better markers have not been found in the DEGs is due to the nature of the DEGs themselves, rather than because depression is polygenic.

So, among the genes that cause IR, are there any that are particularly likely to be common markers for depression? Depression is an immune disorder. Therefore, among the IR genes analysed in this study, the 34 genes identified as immune-related (Figure 3D) are likely to be

good candidates. In addition, immune-related genes change with depression, and the IR genes most likely to interact with them are most likely to change with depression, so IR genes with a high ranking for interaction with immune-related genes, shown in Figure 3FJK, also have a high potential to be markers. Also, hub IR genes with many connections in the interactome (Figure 4B), which we discussed earlier, are also good candidates.

In terms of common markers for depression, a particular highlight of the present study is the detection of a number of cilia-related genes (32 genes; Figure 3C) as IR genes. This may reflect the functional stress state of cilia as antennae in leukaemic cells, although the presence of cilia on leukaemic cells is controversial (55). It is known that when dendritic cells present antigens to T cells, they form structures known as immunological synapses, in which the internal environment of the T cell resembles that of cilia (56, 57, 58). Therefore, the observation of IR in cilia genes may represent a failure of T cells to recognise antigens during depression. An interesting possibility is that cilia-related genes are not equally likely to be IR genes. Of the 1117 ciliary genes currently known, IR was observed in 32 genes in this study (Figure 3C). Surprisingly, of the 37 ciliary genes currently known to cause Joubert syndrome, six (*AHII* (59), *CELSR2* (60), *CEP104* (61), *IFT172* (62), *NPHP1* (63), *TMEM107* (64)) were found to be among the IR genes. In addition, four of these six genes were found to be restored by Japanese herbal medicine. Thus, the Joubert syndrome genes are particularly enriched in IR and highly responsive to Japanese herbal medicine, making these genes probably the best candidates for marker genes for depression. *AHII* and *NPHP1* were also found to be pathways for recovery, as described below (Figure 5). Future clinical trials are awaited to confirm these possibilities, where it will be necessary to determine more reads during sequencing, assuming rMATs is used (rMATs requires approximately five times more sequencing reads than DEG).

When these IR-recovered genes were mapped onto the IR-DEG interactome, 10 pathways were discovered that recovered in association with each other. Although each of these 10 pathways deserves detailed investigation (most of them were newly discovered in this study), it is important to emphasise that in each of the 10 pathways shown here, changes in the IR of one gene are linked to changes in the IR or DEG of another gene, forming a single functional unit (which we call a gear). We will discuss a few of these. The first is the *NPHP1-AHII* pathway. As mentioned above, these two genes are involved in cilia function and their mutations cause a ciliopathy called Joubert syndrome (59, 65, 66, 67). It has been shown experimentally that jouberin, a protein encoded by *AHII*, can interact with nephrocystin, a protein encoded by *NPHP1*, using the yeast two-hybrid system (68). The two proteins form a heterodimer, and mutations in *AHII* that do not form a heterodimer (i.e. V443D in *AHII*) alter the intracellular localisation of *AHII* and *NPHP1* so that the two proteins can, although not always, behave as if

they were one protein (59). It is interesting to note that the introns of these two mRNAs are reduced in depression and both are restored by the administration of the herbal medicine. In other words, the mRNAs transcribed from these two genes seem to be under the same control mechanism of RNA processing, as if they were the same mRNA. These observations remind us of a model we have recently proposed that there may be a novel mechanism that senses the correct level of functional proteins in the cytoplasm and transmits this information to the nucleus to regulate the level of IR (29). If such a mechanism exists, it would mean that introns in the genes for *AH11* and *NPH11* are regulated by a common factor.

In the case of the *MYLK-MYH10* pathway, inflammatory inputs activate MYLK and phosphorylate the L-chain of myosin (47). This causes the contracted L-chain of myosin to transmit information to the H-chain, which in turn regulates the copy number of mitochondrial DNA, which is tightly bound to the non-muscle H-chain (45). In this biological GEAR, the input is inflammation and the output is the control of the number of copies of mitochondrial DNA. The other eight pathways, including the two already postulated, need to be demonstrated biochemically in practice, but brief outlines of the hypothetical pathways are given in the legend of Figure 6.

Figure 5K shows the 10 pathways restored by HKT mapped on the IR-DEG interactome described in this study. This interactome was generated using data from depressed patients and controls only. This means that if a different drug with a different effect to the one used here was used, the new pathways restored by the drug could be detected. Accordingly, such an IR-DEG interactome should be useful for assessing the efficacy of all drugs, including herbal medicines, and for finding new pathways affected by drugs.

In short, we have shown in this paper that IR can be an excellent marker of depression. The combination of network analysis and drug response gene analysis may also reveal new pathways of drug efficacy. The strategy presented here are not limited to the analysis of depression, but can be applied to any disease.

#### Authors' Contributions

Norihiro Okada conceived, supervised and validated the project and wrote and finalised the manuscript. Kenshiro Oshima analysed and visualised the data and wrote the Materials and Methods and legends. Akiko Maruko analysed the PCR data. Mariko Sekine suggested the application of the IR method to human subjects. Naoki Ito performed PBMC isolation. Akino Wakasugi analysed the human data. Eiko Mori and Hiroshi Odaguchi designed and performed the clinical research. Yoshinori Kobayashi organised the human COI project. All authors read, revised, edited, and approved the final manuscript.

### Competing interests

N.O., K.O. and A.M. received a research grant from TSUMURA and CO. Although TSUMURA is a manufacturer of the Japanese herbal (Kampo) medicine, the company did not provide the Kampo used in this study, which was prepared at the Kitasato University Oriental Medicine Research Center. All research members of this study declare no potential conflicts of interest.

### Figure legends.

**Fig. 1. Comparison of RNA expression between depressed subjects and less depressed controls.** (A) (□) Table of subject information. Classification was based on the BDI-II score at the first examination, with  $<16$  being less depressed controls and  $\geq 16$  being depressed subjects. (CON, less depressed controls; BMT, depressed subjects (before medical treatment); AMT, depressed subjects after 2 months of taking HKT (after medical treatment)) (i□) In each group, mean and standard deviation of sex, age, and BDI-II score were shown. (B) Volcano plot of RNA expression between BMT and CON groups. Horizontal axis shows  $\log_2$  fold-change of BMT/CON and vertical axis shows  $-\log_{10}P$  values. Significantly upregulated genes are indicated by red dots ( $FC > 1.2$  and  $P < 0.05$ ), downregulated genes are indicated by blue dots ( $FC > 1/1.2$  and  $P < 0.05$ ), and no significant differences are shown in grey using the likelihood ratio test. Gene symbols of T cell associated genes were indicated. (C) Heatmap of significantly differentially expressed genes between BMT and CON individuals. (D-E) Enrichment analysis of biological process gene ontology and KEGG pathway terms using 641 up-regulated (D) or 922 down-regulated (E) genes in BMT. Horizontal axis shows  $-\log_{10}P$  values. Green bars indicate gene ontology biological process terms and yellow bars indicate KEGG pathway terms.

### **Fig. 2. IR genes were isolated and characterised by comparison between BMT and CON.**

(A) Bar chart of the number of IR genes with significantly increased (IncIR) or decreased (DecIR) in BMT using rMATS software v.4.1.1. Significant difference criteria are P-value less than 0.05 and difference in intron ratios greater than 0.05. (B) Heatmap of significantly different IR loci between BMT and CON. (C-D) Bar chart of enrichment analysis of biological process gene ontology and KEGG pathway terms using 158 genes with IncIR (C) and 198 genes with DecIR (D) in BMT. Gene symbols corresponding to the terms are shown on the right. The

horizontal axis shows  $-\log_{10}P$  values. Green bars indicate gene ontology biological process terms and yellow bars indicate KEGG pathway terms.

**Figure 3. IR loci interact preferentially with genes involved in innate immunity.** (A) Number of IR genes and IR protein-coding genes. (B) Venn diagram between IR genes, cilia-related genes (GO:0060271 cilium assembly + SCGSv2 ciliary genes (69)), adaptive and innate immunity related genes (GO:0046649 lymphocyte activation and GO:0006955 immune response), psychiatric disorders-relevant (PD) genes. The PD gene sets was constructed by merging genes from the following databases or previous studies: SFARI (autism-related gene database, <https://www.sfari.org/resource/sfari-gene/>); PsyGeNET (mental disorder-related gene database, <https://www.sfari.org/resource/sfari-gene/>); Psychiatric disorders-related genes <http://www.psygenet.org/web/PsyGeNET/menu/home>); Psychiatric disorders-relevant genes (70); Major depression risk genes (71) (C) Gene symbols shared between IR and cilia-related genes are shown, corresponding to the area circled in red in Fig. 3B. Groups were classified as IncIR, DecIR or Mixed ('Mixed' indicates a gene containing both IncIR and DecIR). (D) Gene symbols shared between IR and immunity related genes, corresponding to the area surrounded by blue in Fig. 3B. (E) Network showing significant protein-protein interactions (PPI) between IR genes and innate immune response-related genes. The interaction score was calculated using the full STRING network confidence score 0.7 from the STRING database. (left) Network of PPIs between proteins encoded by IR genes and innate immune response proteins (GO:0045087). Innate immune response proteins are placed in the central circle and IR proteins (red: IncIR, blue: DecIR, green: mixed) on either side. (right) Instead of IR proteins, an equal number of randomly selected gene sets were placed on both sides. Ranking table of the top 30 proteins with the highest number of interactions (number of links) with the IR in (F) and with 5 randomly selected protein sets in (G). (H) Bar chart comparing the average number of interactions (number of links) with innate immune response proteins in the IR and 5 random protein sets. (I) Bar chart comparing the average number of interactions (number of links) with innate immune response proteins in DecIR and IncIR proteins. (J) Ranking table of the top 30 proteins with the highest number of interactions (links) to lymphocyte activation proteins (GO:0046649) in IR proteins. (K) Ranking table of the top 30 proteins with the highest number of interactions (links) to immune response proteins (GO:0006955) in the IR proteins.

**Fig.4. PPI network of IR and DEG proteins.** (A) A main network showing protein-protein interactions using all IR and DEG proteins between CON and BMT. The interaction score was calculated using the full STRING network confidence score 0.7 from the STRING database. (IncIR: red filled circle, DecIR: blue filled circle, Mixed: green filled circle, Upregulation: small

circle with red border, Downregulation: small circle with blue border). Only the largest networks are shown, singletons and smaller networks are excluded. IR protein names are shown. (A Square bottom right) Proteins with  $\geq 10$  interactions (number of links) are marked with symbols. (B) Ranking table of protein names with 10 or more interactions. (C-E) Proteins corresponding to cilia (brown, GO:0060271 cilium assembly) in (C), lymphocyte activation (purple, GO:0046649 lymphocyte activation) in (D) and innate immunity (light green, GO:0045087 innate immune response) in (E) are coloured in the network in Figure 4A.

**Fig. 5. Recovery of IR by administration of HKT.** (A) (Top, left) Venn diagram of intronic loci that were significantly increased (IncIR between CON and BMT) and those that were decreased (DecIR between BMT and AMT) by drug treatment. (Bottom, left) Gene symbols with recovered loci are shown (Protein coding genes are shown in bold.). (Right) Box plot showing average intron ratios at recovered loci. (B) (Top, left) Venn diagram of intronic loci that were significantly decreased (DecIR between CON and BMT) and those that were increased (IncIR between BMT and AMT) by drug treatment. (Bottom, right) Gene symbols with recovered loci are shown (Protein coding genes are shown in bold.). (C) Table of functional categorisation from the literature of the recovered IR genes.

**Figure 6. New pathways discovered from drug recovery on the PPI network.**

(A-J) The network was extracted from the PPI network overlaid with recovered IR and DEG loci. All recovered IR loci except *PLD2* showed a significant difference ( $P < 0.05$ ,  $FC > 1.2$ ) between CON and BMT and between BMT and AMT. All DEG loci showed a significant difference ( $P < 0.05$ ,  $FC > 1.2$ ) between CON and BMT, but their significance between BMT and AMT is marginal ( $P < 0.3$ ) using the likelihood ratio test. IR gene is indicated by a large circle, where blue is DecIR and red is IncIR. DEG is indicated by a small circle, where blue indicates downregulation and red indicates upregulation. Bar graphs show intron ratios for IR and gene expression levels for DEG. In the bar graph, asterisks indicate statistically significant differences (\*:  $p < 0.05$ , \*\*:  $p < 0.01$ , \*\*\*:  $p < 0.001$ , NS: not significant). (A) The pathway involving *NDUFA5*, *FOXRED1*, *NDUFV2* and *ATP5MGL* (72) regulates mitochondrial function. (B) The *TP73* (73) - *FAS* (74) - *CAVI* (75, 76) - *PDGFRA* (77) pathway is involved in inflammatory signalling. (C) The *CAVI* (75, 76) - *PLD2* (78) - *NAPEPLD* (79, 80) signalling pathway is involved in the regulation of lipid metabolism involving caveolae as a vital plasma membrane sensor. (D) The *DDX5* (81, 82) - *ZWINT* (83) - *UBE2T* (84) pathway is involved in the amplification by ubiquitination of an inflammatory signal taken up by *DDX5* via the immune infiltration stimulated by *ZWINT*. (E) The *CERT1* (85) - *COL4A3* (86) - *ITGA9* (87) pathway is involved in anti-inflammatory responses. (F) The *HOXA1* (88) - *ROBO3* (89) -

*NTN1* (90) signalling pathway regulates inflammation. (G) See text. (H) The *SMARCD2* (91, 92) - *BRD9* (93, 94) signalling pathway is involved in a mediator of an inflammatory input activated by *BRD9* leading to mediated granulopoiesis as an output through activation of *SMARCD2*. (I) See text. (J) The *EOGT* (95) - *DOCK6* (96) pathway is involved in the regulation of haematopoiesis. (K) On the main network, each position of the pathways (A - H) is indicated by a red square.

**Table 1.** Sensor / Regulatory genes were isolated from the protein-coding IR genes

| Category      | Gene                             | Function                                             | Ref.  |
|---------------|----------------------------------|------------------------------------------------------|-------|
| Sensor        | <i>ADGRB2</i>                    | Metabotropic mechanosensor                           | (123) |
|               | <i>AIF1</i>                      | Innate response sensor                               | (124) |
|               | <i>CD163</i>                     | Macrophage innate immune sensor                      | (125) |
|               | <i>DDX5</i>                      | Interferon antiviral sensor                          | (126) |
|               | <i>DDX3X</i>                     | Interferon antiviral sensor                          | (126) |
|               | <i>ERLIN1</i>                    | Innate immune sensor                                 | (127) |
|               | <i>GBF1</i>                      | ER_sensor                                            | (102) |
|               | <i>HTRA2</i>                     | Mitochondria stress sensor                           | (128) |
|               | <i>LRSAM1</i>                    | Bacterial sensor                                     | (129) |
|               | <i>MAP3K12</i><br>( <i>DLK</i> ) | axon-damage sensor                                   | (130) |
|               | <i>MOK (RAGE)</i>                | Haem sensor                                          | (131) |
|               | <i>NDRG2</i>                     | Inflammaton sensor                                   | (115) |
|               | <i>NFATC4</i>                    | Nerve sensor                                         | (116) |
|               | <i>OAS2</i>                      | Viral sensor                                         | (117) |
|               | <i>PQBPI</i>                     | HIV innate response sensor                           | (132) |
|               | <i>SARM1</i>                     | Metabolic sensor                                     | (133) |
|               | <i>SLC9A5 (NHE5)</i>             | PH sensor                                            | (134) |
|               | <i>SLC16A11</i>                  | Glucose lipid sensor                                 | (135) |
| <i>ZNF598</i> | Collided_ribosome sensor         | (136)                                                |       |
| Regulator     | <i>ADCY4</i>                     | Controls caspase-11 inflammasome activation          | (107) |
|               | <i>BRD9</i>                      | Regulates interferon-stimulated genes                | (93)  |
|               | <i>BTBD3</i>                     | Controls dendrite orientation                        | (137) |
|               | <i>BTN3A3</i>                    | Regulates ERK1/2 phosphorylation                     | (138) |
|               | <i>CACNB3</i>                    | Regulates ATP-dependent migration of dendritic cells | (139) |

|                |                                                             |       |
|----------------|-------------------------------------------------------------|-------|
| <i>CFB</i>     | Regulates cellular senescence                               | (140) |
| <i>CLK4</i>    | Regulates DNA damage induced NF-kB                          | (141) |
| <i>HAGHL</i>   | Regulates human colorectal cancer progression               | (142) |
| <i>ITGAL</i>   | Regulates glioma growth                                     | (143) |
| <i>MAT2B</i>   | Regulates EGFR signaling pathway                            | (144) |
| <i>Mettl17</i> | Regulates mitochondrial ribosomal RNA modifications         | (145) |
| <i>MICAL1</i>  | Regulates actin microfilaments                              | (146) |
| <i>MSH5</i>    | Regulates Ig class switch recombination                     | (147) |
| <i>MYO1G</i>   | Regulates exocytosis, and endocytosis in B lymphocytes      | (148) |
| <i>MYSM1</i>   | Regulates hematopoietic stem cell maintenance               | (149) |
| <i>NAPEPLD</i> | Regulates liver lipid metabolism                            | (79)  |
| <i>PGM3</i>    | Regulates beta-catenin activity                             | (150) |
| <i>PLD2</i>    | Regulates phagocyte cell migration                          | (151) |
| <i>PTPN18</i>  | Regulates the c-MYC-CDK4 axis                               | (152) |
| <i>ROBO3</i>   | Modulates prognosis via AXL-associated inflammatory network | (89)  |
| <i>SCFD1</i>   | Regulates SNARE complex formation                           | (153) |
| <i>SNAP23</i>  | Regulates phagocytosis                                      | (154) |
| <i>STARD9</i>  | Regulates Spindle Pole Assembly                             | (155) |
| <i>STAT1</i>   | Regulates transcription in the interferon JAK-STAT pathway  | (39)  |
| <i>TRA2A</i>   | Regulates EZH2/beta-catenin pathway                         | (156) |
| <i>UBE2T</i>   | Promotes autophagy                                          | (121) |

## Reference

1. (2017): Global health estimates : Depression and other common mental disorders. Geneva: World Health Organization.
2. Drevets WC, Wittenberg GM, Bullmore ET, Manji HK (2022):Immune targets for therapeutic development in depression: towards precision medicine. Nature Reviews Drug Discovery 21, 224-244.
3. Leday GGR, Vertes PE, Richardson S, Greene JR, Regan T, Khan S et al. (2018):Replicable and Coupled Changes in Innate and Adaptive Immune Gene Expression in Two Case-Control Studies of Blood Microarrays in Major Depressive Disorder. Biol Psychiatry 83, 70-80.
4. Leonard BE (2010):The concept of depression as a dysfunction of the immune system. Curr



Immunol Rev 6, 205-212.

5. Nobis A, Zalewski D, Waszkiewicz N (2020):Peripheral Markers of Depression. *J Clin Med* 9.
6. Sullivan PF, Geschwind DH (2019):Defining the Genetic, Genomic, Cellular, and Diagnostic Architectures of Psychiatric Disorders. *Cell* 177, 162-183.
7. Beurel E, Toups M, Nemeroff CB (2020):The Bidirectional Relationship of Depression and Inflammation: Double Trouble. *Neuron* 107, 234-256.
8. Chamberlain SR, Cavanagh J, de Boer P, Mondelli V, Jones DNC, Drevets WC et al. (2019):Treatment-resistant depression and peripheral C-reactive protein. *Br J Psychiatry* 214, 11-19.
9. Dantzer R, O'Connor JC, Freund GG, Johnson RW, Kelley KW (2008):From inflammation to sickness and depression: when the immune system subjugates the brain. *Nat Rev Neurosci* 9, 46-56.
10. Grosse L, Carvalho LA, Wijkhuijs AJ, Bellingrath S, Ruland T, Ambree O et al. (2015):Clinical characteristics of inflammation-associated depression: Monocyte gene expression is age-related in major depressive disorder. *Brain Behav Immun* 44, 48-56.
11. Grosse L, Hoogenboezem T, Ambree O, Bellingrath S, Jorgens S, de Wit HJ et al. (2016):Deficiencies of the T and natural killer cell system in major depressive disorder: T regulatory cell defects are associated with inflammatory monocyte activation. *Brain Behav Immun* 54, 38-44.
12. Lynall ME, Turner L, Bhatti J, Cavanagh J, de Boer P, Mondelli V et al. (2020):Peripheral Blood Cell-Stratified Subgroups of Inflamed Depression. *Biol Psychiatry* 88, 185-196.
13. Snijders G, Schiweck C, Mesman E, Grosse L, De Wit H, Nolen WA et al. (2016):A dynamic course of T cell defects in individuals at risk for mood disorders. *Brain Behav Immun* 58, 11-17.
14. Syed SA, Beurel E, Loewenstein DA, Lowell JA, Craighead WE, Dunlop BW et al. (2018):Defective Inflammatory Pathways in Never-Treated Depressed Patients Are Associated with Poor Treatment Response. *Neuron* 99, 914-924 e913.
15. Haapakoski R, Mathieu J, Ebmeier KP, Alenius H, Kivimaki M (2015):Cumulative meta-analysis of interleukins 6 and 1beta, tumour necrosis factor alpha and C-reactive protein in patients with major depressive disorder. *Brain Behav Immun* 49, 206-215.
16. Khandaker GM, Pearson RM, Zammit S, Lewis G, Jones PB (2014):Association of serum interleukin 6 and C-reactive protein in childhood with depression and psychosis in young adult life: a population-based longitudinal study. *JAMA Psychiatry* 71, 1121-1128.
17. Miller AH, Maletic V, Raison CL (2009):Inflammation and its discontents: the role of cytokines in the pathophysiology of major depression. *Biol Psychiatry* 65, 732-741.

18. Matcham F, Rayner L, Steer S, Hotopf M (2013):The prevalence of depression in rheumatoid arthritis: a systematic review and meta-analysis. *Rheumatology (Oxford)* 52, 2136-2148.
19. Bullmore E (2018) *The inflamed mind: A radical new approach to depression*, *The inflamed mind: A radical new approach to depression*. New York, NY, US: Picador.
20. Chan KL, Poller WC, Swirski FK, Russo SJ (2023):Central regulation of stress-evoked peripheral immune responses. *Nat Rev Neurosci* 24, 591-604.
21. Naro C, Jolly A, Di Persio S, Bielli P, Setterblad N, Alberdi AJ et al. (2017):An Orchestrated Intron Retention Program in Meiosis Controls Timely Usage of Transcripts during Germ Cell Differentiation. *Dev Cell* 41, 82-93 e84.
22. Pimentel H, Parra M, Gee SL, Mohandas N, Pachter L, Conboy JG (2016):A dynamic intron retention program enriched in RNA processing genes regulates gene expression during terminal erythropoiesis. *Nucleic Acids Res* 44, 838-851.
23. Ullrich S, Guigo R (2020):Dynamic changes in intron retention are tightly associated with regulation of splicing factors and proliferative activity during B-cell development. *Nucleic Acids Res* 48, 1327-1340.
24. Wong JJ, Ritchie W, Ebner OA, Selbach M, Wong JW, Huang Y et al. (2013):Orchestrated intron retention regulates normal granulocyte differentiation. *Cell* 154, 583-595.
25. Adusumalli S, Ngian ZK, Lin WQ, Benoukraf T, Ong CT (2019):Increased intron retention is a post-transcriptional signature associated with progressive aging and Alzheimer's disease. *Aging Cell* 18, e12928.
26. Dvinge H, Bradley RK (2015):Widespread intron retention diversifies most cancer transcriptomes. *Genome Med* 7, 45.
27. Okada N, Oshima K, Iwasaki Y, Maruko A, Matsumura K, Iioka E et al. (2021):Intron retention as a new pre-symptomatic marker of aging and its recovery to the normal state by a traditional Japanese multi-herbal medicine. *Gene* 794, 145752.
28. Vu T-D, Ito N, Oshima K, Maruko A, Nishi A, Mizoguchi K et al. (2022):Intron retention is a stress response in sensor genes and is restored by Japanese herbal medicines: A basis for future clinical applications. *Gene* 830, 146496.
29. Okada N, Oshima K, Maruko A, Vu T-D, Chiu M-T, Nishiyama M et al. (2023):A potential pathway that links intron retention with the physiological recovery by a Japanese herbal medicine. *bioRxiv*, 2023.2012.2002.569734.
30. Endo M, Oikawa T, Tonooka M, Hanawa T, Odaguchi H, Hori M (2022):Hangekobokuto, a traditional Japanese herbal medicine, ameliorates postoperative ileus through its anti-inflammatory action. *J Smooth Muscle Res* 58, 78-88.
31. Nishi A, Kaifuchi N, Shimobori C, Ohbuchi K, Iizuka S, Sugiyama A et al. (2021):Effects of

maoto (ma-huang-tang) on host lipid mediator and transcriptome signature in influenza virus infection. *Sci Rep* 11, 4232.

32. Yamamoto M (2022):KAMPOMics: A framework for multidisciplinary and comprehensive research on Japanese traditional medicine. *Gene* 831, 146555.

33. Bolger AM, Lohse M, Usadel B (2014):Trimmomatic: a flexible trimmer for Illumina sequence data. *Bioinformatics (Oxford, England)* 30, 2114-2120.

34. Kim D, Paggi JM, Park C, Bennett C, Salzberg SL (2019):Graph-based genome alignment and genotyping with HISAT2 and HISAT-genotype. *Nature Biotechnology* 37, 907-915.

35. Langmead B, Salzberg SL (2012):Fast gapped-read alignment with Bowtie 2. *Nature Methods* 9, 357-359.

36. Martin M (2011):Cutadapt removes adapter sequences from high-throughput sequencing reads. 2011 17, 3.

37. Frezza D, DiCarlo E, Hale C, Ramirez D, Mehta B, Slater D et al. (2023):Computer Vision Analysis of Rheumatoid Arthritis Synovium Reveals Lymphocytic Inflammation Is Associated With Immunoglobulin Skewing in Blood. *Arthritis Rheumatol* 75, 2137-2147.

38. Woof JM, Kerr MA (2006):The function of immunoglobulin A in immunity. *J Pathol* 208, 270-282.

39. Au-Yeung N, Mandhana R, Horvath CM (2013):Transcriptional regulation by STAT1 and STAT2 in the interferon JAK-STAT pathway. *JAKSTAT* 2, e23931.

40. Lowell CA (2004):Src-family kinases: rheostats of immune cell signaling. *Mol Immunol* 41, 631-643.

41. Cheng MC, Lu CL, Luu SU, Tsai HM, Hsu SH, Chen TT et al. (2010):Genetic and functional analysis of the DLG4 gene encoding the post-synaptic density protein 95 in schizophrenia. *PLoS One* 5, e15107.

42. Wang MS, Hu Y, Sanchez EE, Xie X, Roy NH, de Jesus M et al. (2022):Mechanically active integrins target lytic secretion at the immune synapse to facilitate cellular cytotoxicity. *Nat Commun* 13, 3222.

43. Xu S, Jiang C, Liu H, Zhang H, Liao H, Wang X et al. (2020):Integrin-alpha9 and Its Corresponding Ligands Play Regulatory Roles in Chronic Periodontitis. *Inflammation* 43, 1488-1497.

44. Crux NB, Elahi S (2017):Human Leukocyte Antigen (HLA) and Immune Regulation: How Do Classical and Non-Classical HLA Alleles Modulate Immune Response to Human Immunodeficiency Virus and Hepatitis C Virus Infections? *Front Immunol* 8, 832.

45. Reyes A, He J, Mao CC, Bailey LJ, Di Re M, Sembongi H et al. (2011):Actin and myosin contribute to mammalian mitochondrial DNA maintenance. *Nucleic Acids Res* 39, 5098-5108.

46. Kim DY, Helfman DM (2016):Loss of MLCK leads to disruption of cell-cell adhesion and

invasive behavior of breast epithelial cells via increased expression of EGFR and ERK/JNK signaling. *Oncogene* 35, 4495-4508.

47. Xiong Y, Wang C, Shi L, Wang L, Zhou Z, Chen D et al. (2017):Myosin Light Chain Kinase: A Potential Target for Treatment of Inflammatory Diseases. *Front Pharmacol* 8, 292.

48. Dedio J, Konig P, Wohlfart P, Schroeder C, Kummer W, Muller-Esterl W (2001):NOSIP, a novel modulator of endothelial nitric oxide synthase activity. *FASEB J* 15, 79-89.

49. Czarny P, Wigner P, Galecki P, Sliwinski T (2018):The interplay between inflammation, oxidative stress, DNA damage, DNA repair and mitochondrial dysfunction in depression. *Prog Neuropsychopharmacol Biol Psychiatry* 80, 309-321.

50. Scally SW, Petersen J, Law SC, Dudek NL, Nel HJ, Loh KL et al. (2013):A molecular basis for the association of the HLA-DRB1 locus, citrullination, and rheumatoid arthritis. *J Exp Med* 210, 2569-2582.

51. Morgan JT, Fink GR, Bartel DP (2019):Excised linear introns regulate growth in yeast. *Nature* 565, 606-611.

52. Parenteau J, Maignon L, Berthoumieux M, Catala M, Gagnon V, Abou Elela S (2019):Introns are mediators of cell response to starvation. *Nature* 565, 612-617.

53. Hori H, Sasayama D, Teraishi T, Yamamoto N, Nakamura S, Ota M et al. (2016):Blood-based gene expression signatures of medication-free outpatients with major depressive disorder: integrative genome-wide and candidate gene analyses. *Sci Rep* 6, 18776.

54. Ikeda M, Saito T, Kanazawa T, Iwata N (2021):Polygenic risk score as clinical utility in psychiatry: a clinical viewpoint. *J Hum Genet* 66, 53-60.

55. Le Borgne M, Shaw AS (2013):Do T Cells Have a Cilium? *Science* 342, 1177-1178.

56. Calvo V, Izquierdo M (2021):Role of Actin Cytoskeleton Reorganization in Polarized Secretory Traffic at the Immunological Synapse. *Front Cell Dev Biol* 9, 629097.

57. Martin-Cofreces NB, Baixauli F, Sanchez-Madrid F (2014):Immune synapse: conductor of orchestrated organelle movement. *Trends Cell Biol* 24, 61-72.

58. Stinchcombe JC, Griffiths GM (2014):Communication, the centrosome and the immunological synapse. *Philos Trans R Soc Lond B Biol Sci* 369.

59. Tuz K, Hsiao YC, Juarez O, Shi B, Harmon EY, Phelps IG et al. (2013):The Joubert syndrome-associated missense mutation (V443D) in the Abelson-helper integration site 1 (AHI1) protein alters its localization and protein-protein interactions. *J Biol Chem* 288, 13676-13694.

60. Vilboux T, Malicdan MC, Roney JC, Cullinane AR, Stephen J, Yildirimli D et al. (2017):CELSR2, encoding a planar cell polarity protein, is a putative gene in Joubert syndrome with cortical heterotopia, microphthalmia, and growth hormone deficiency. *Am J Med Genet A* 173, 661-666.

61. Srour M, Hamdan FF, McKnight D, Davis E, Mandel H, Schwartztruber J et al. (2015):Joubert Syndrome in French Canadians and Identification of Mutations in CEP104. *Am J Hum Genet* 97, 744-753.
62. Halbritter J, Bizet AA, Schmidts M, Porath JD, Braun DA, Gee HY et al. (2013):Defects in the IFT-B component IFT172 cause Jeune and Mainzer-Saldino syndromes in humans. *Am J Hum Genet* 93, 915-925.
63. Tory K, Lacoste T, Burglen L, Moriniere V, Boddaert N, Macher MA et al. (2007):High NPHP1 and NPHP6 mutation rate in patients with Joubert syndrome and nephronophthisis: potential epistatic effect of NPHP6 and AHI1 mutations in patients with NPHP1 mutations. *J Am Soc Nephrol* 18, 1566-1575.
64. Lambacher NJ, Bruel AL, van Dam TJ, Szymanska K, Slaats GG, Kuhns S et al. (2016):TMEM107 recruits ciliopathy proteins to subdomains of the ciliary transition zone and causes Joubert syndrome. *Nat Cell Biol* 18, 122-131.
65. Gana S, Serpieri V, Valente EM (2022):Genotype-phenotype correlates in Joubert syndrome: A review. *Am J Med Genet C Semin Med Genet* 190, 72-88.
66. Guo J, Otis JM, Suciú SK, Catalano C, Xing L, Constable S et al. (2019):Primary Cilia Signaling Promotes Axonal Tract Development and Is Disrupted in Joubert Syndrome-Related Disorders Models. *Dev Cell* 51, 759-774 e755.
67. Srivastava S, Molinari E, Raman S, Sayer JA (2017):Many Genes-One Disease? Genetics of Nephronophthisis (NPHP) and NPHP-Associated Disorders. *Front Pediatr* 5, 287.
68. Eley L, Gabrielides C, Adams M, Johnson CA, Hildebrandt F, Sayer JA (2008):Joubertin localizes to collecting ducts and interacts with nephrocystin-1. *Kidney Int* 74, 1139-1149.
69. Vasquez SSV, Dam Jv, Wheway G (2021):An updated SYSCILIA gold standard (SCGSv2) of known ciliary genes, revealing the vast progress that has been made in the cilia research field. *Molecular Biology of the Cell* 32, br13.
70. Sato DX, Kawata M (2018):Positive and balancing selection on SLC18A1 gene associated with psychiatric disorders and human-unique personality traits. *Evolution letters* 2, 499-510.
71. Sall S, Thompson W, Santos A, Dwyer DS (2021):Analysis of Major Depression Risk Genes Reveals Evolutionary Conservation, Shared Phenotypes, and Extensive Genetic Interactions. *Frontiers in psychiatry* 12, 698029.
72. Formosa LE, Mimaki M, Frazier AE, McKenzie M, Stait TL, Thorburn DR et al. (2015):Characterization of mitochondrial FOXRED1 in the assembly of respiratory chain complex I. *Hum Mol Genet* 24, 2952-2965.
73. Zhang J, Sun W, Yan W, Kong X, Shen T, Laubach K et al. (2023):TP73 Isoform-specific disruption reveals a critical role of TAp73beta in growth suppression and inflammatory response. *Cell Death Dis* 14, 14.

74. Xie J, Li B, Yao B, Zhang P, Wang L, Lu H et al. (2020):Transforming growth factor-beta1-regulated Fas/FasL pathway activation suppresses nucleus pulposus cell apoptosis in an inflammatory environment. *Biosci Rep* 40.
75. Celus W, Di Conza G, Oliveira AI, Ehling M, Costa BM, Wenes M et al. (2017):Loss of Caveolin-1 in Metastasis-Associated Macrophages Drives Lung Metastatic Growth through Increased Angiogenesis. *Cell Rep* 21, 2842-2854.
76. Parton RG, del Pozo MA (2013):Caveolae as plasma membrane sensors, protectors and organizers. *Nat Rev Mol Cell Biol* 14, 98-112.
77. Bertero L, Gambella A, Barreca A, Osella-Abate S, Chiusa L, Francia di Celle P et al. (2022):Caveolin-1 expression predicts favourable outcome and correlates with PDGFRA mutations in gastrointestinal stromal tumours (GISTs). *Journal of clinical pathology* 75, 825-831.
78. Hwang WC, Seo SH, Kang M, Kang RH, Di Paolo G, Choi KY et al. (2021):PLD1 and PLD2 differentially regulate the balance of macrophage polarization in inflammation and tissue injury. *J Cell Physiol* 236, 5193-5211.
79. Lefort C, Roumain M, Van Hul M, Rastelli M, Manco R, Leclercq I et al. (2020):Hepatic NAPE-PLD Is a Key Regulator of Liver Lipid Metabolism. *Cells* 9.
80. Zarrow JE, Alli-Oluwafuyi AM, Youwakim CM, Kim K, Jenkins AN, Suero IC et al. (2023):Small Molecule Activation of NAPE-PLD Enhances Efferocytosis by Macrophages. *ACS Chem Biol* 18, 1891-1904.
81. You H, Ma L, Wang X, Zhang F, Han Y, Yao J et al. (2022):The emerging role of DEAD/H-box helicases in hepatitis B virus infection. *Front Cell Infect Microbiol* 12, 1062553.
82. Zan J, Xu R, Tang X, Lu M, Xie S, Cai J et al. (2020):RNA helicase DDX5 suppresses IFN-I antiviral innate immune response by interacting with PP2A-Cbeta to deactivate IRF3. *Exp Cell Res* 396, 112332.
83. Li Z, Xiao X, Ye F, Cheng Y, Mi J (2023):Upregulation of the ZWINT expression correlates with prostate cancer progression and immune infiltration. *Journal of Men's Health* 19, 65-75.
84. Zhu X, Li T, Niu X, Chen L, Ge C (2020):Identification of UBE2T as an independent prognostic biomarker for gallbladder cancer. *Oncol Lett* 20, 44.
85. Gaggini M, Ndreu R, Michelucci E, Rocchiccioli S, Vassalle C (2022):Ceramide as Mediators of Oxidative Stress and Inflammation in Cardiometabolic Disease. *Int J Mol Sci* 23.
86. Weckmann M, Bahmer T, Sand JM, Rank Ronnow S, Pech M, Vermeulen C et al. (2021):COL4A3 is degraded in allergic asthma and degradation predicts response to anti-IgE therapy. *Eur Respir J* 58.
87. Ciechanowska A, Rojewska E, Piotrowska A, Barut J, Pawlik K, Ciapala K et al. (2022):New insights into the analgesic properties of the XCL1/XCR1 and XCL1/ITGA9 axes

- modulation under neuropathic pain conditions - evidence from animal studies. *Front Immunol* 13, 1058204.
88. Tamini A, Draime A, Tys J, Lambert B, Vandeputte J, Nguyen N et al. (2016):HOXA1 binds RBCK1/HOIL-1 and TRAF2 and modulates the TNF/NF-kappaB pathway in a transcription-independent manner. *Nucleic Acids Res* 44, 7331-7349.
89. Krebs N, Klein L, Wegwitz F, Espinet E, Maurer HC, Tu M et al. (2022):Axon guidance receptor ROBO3 modulates subtype identity and prognosis via AXL-associated inflammatory network in pancreatic cancer. *JCI Insight* 7.
90. Mirakaj V, Thix CA, Laucher S, Mielke C, Morote-Garcia JC, Schmit MA et al. (2010):Netrin-1 dampens pulmonary inflammation during acute lung injury. *Am J Respir Crit Care Med* 181, 815-824.
91. Priam P, Krasteva V, Rousseau P, D'Angelo G, Gaboury L, Sauvageau G et al. (2017):SMARCD2 subunit of SWI/SNF chromatin-remodeling complexes mediates granulopoiesis through a CEBPvarepsilon dependent mechanism. *Nat Genet* 49, 753-764.
92. Witzel M, Petersheim D, Fan Y, Bahrami E, Racek T, Rohlf M et al. (2017):Chromatin-remodeling factor SMARCD2 regulates transcriptional networks controlling differentiation of neutrophil granulocytes. *Nat Genet* 49, 742-752.
93. Ahmed NS, Gatchalian J, Ho J, Burns MJ, Hah N, Wei Z et al. (2022):BRD9 regulates interferon-stimulated genes during macrophage activation via cooperation with BET protein BRD4. *Proc Natl Acad Sci U S A* 119.
94. Wang X, Wang S, Troisi EC, Howard TP, Haswell JR, Wolf BK et al. (2019):BRD9 defines a SWI/SNF sub-complex and constitutes a specific vulnerability in malignant rhabdoid tumors. *Nat Commun* 10, 1881.
95. Tanwar A, Stanley P (2023):Synergistic regulation of Notch signaling by different O-glycans promotes hematopoiesis. *Front Immunol* 14, 1097332.
96. Scharler C, Poupardin R, Ebner-Peking P, Wolf M, Schreck C, Brachtl G et al. (2022):Extra-hematopoietic immunomodulatory role of the guanine-exchange factor DOCK2. *Commun Biol* 5, 1246.
97. King R, Gallagher PJ, Khoriaty R (2022):The congenital dyserythroipoietic anemias: genetics and pathophysiology. *Curr Opin Hematol* 29, 126-136.
98. Michel BC, Kadoch C (2017):A SMARCD2-containing mSWI/SNF complex is required for granulopoiesis. *Nat Genet* 49, 655-657.
99. Narayanan L, Fritzell JA, Baker SM, Liskay RM, Glazer PM (1997):Elevated levels of mutation in multiple tissues of mice deficient in the DNA mismatch repair gene Pms2. *Proc Natl Acad Sci U S A* 94, 3122-3127.
100. Yoon SW, Lee MS, Xaver M, Zhang L, Hong SG, Kong YJ et al. (2016):Meiotic prophase

roles of Rec8 in crossover recombination and chromosome structure. *Nucleic Acids Res* 44, 9296-9314.

101. Tan C, Meng L, Lv M, He X, Sha Y, Tang D et al. (2022):Bi-allelic variants in DNHD1 cause flagellar axoneme defects and asthenoteratozoospermia in humans and mice. *Am J Hum Genet* 109, 157-171.

102. Wen C, Zhou Y, Xu Y, Tan H, Pang C, Liu H et al. (2021):The Regulatory Role of GBF1 on Osteoclast Activation Through EIF2a Mediated ER Stress and Novel Marker FAM129A Induction. *Front Cell Dev Biol* 9, 706768.

103. Sebastian D, Hernandez-Alvarez MI, Segales J, Sorianello E, Munoz JP, Sala D et al. (2012):Mitofusin 2 (Mfn2) links mitochondrial and endoplasmic reticulum function with insulin signaling and is essential for normal glucose homeostasis. *Proc Natl Acad Sci U S A* 109, 5523-5528.

104. Fukunaga K, Shinoda Y, Tagashira H (2015):The role of SIGMAR1 gene mutation and mitochondrial dysfunction in amyotrophic lateral sclerosis. *J Pharmacol Sci* 127, 36-41.

105. Shanmughapriya S, Rajan S, Hoffman NE, Higgins AM, Tomar D, Nemani N et al. (2015):SPG7 Is an Essential and Conserved Component of the Mitochondrial Permeability Transition Pore. *Mol Cell* 60, 47-62.

106. Minczuk M, He J, Duch AM, Ettema TJ, Chlebowski A, Dzionek K et al. (2011):TEFM (c17orf42) is necessary for transcription of human mtDNA. *Nucleic Acids Res* 39, 4284-4299.

107. Chen R, Zeng L, Zhu S, Liu J, Zeh HJ, Kroemer G et al. (2019):cAMP metabolism controls caspase-11 inflammasome activation and pyroptosis in sepsis. *Science advances* 5, eaav5562.

108. Zhang W, Lu Y, Li X, Zhang J, Zheng L, Zhang W et al. (2018):CDCA3 promotes cell proliferation by activating the NF-kappaB/cyclin D1 signaling pathway in colorectal cancer. *Biochem Biophys Res Commun* 500, 196-203.

109. Burke SJ, Lu D, Sparer TE, Masi T, Goff MR, Karlstad MD et al. (2014):NF-kappaB and STAT1 control CXCL1 and CXCL2 gene transcription. *Am J Physiol Endocrinol Metab* 306, E131-149.

110. Ni X, Xu Y, Wang W, Kong B, Ouyang J, Chen J et al. (2022):IL-17D-induced inhibition of DDX5 expression in keratinocytes amplifies IL-36R-mediated skin inflammation. *Nat Immunol* 23, 1577-1587.

111. Feitosa MF, Wojczynski MK, North KE, Zhang Q, Province MA, Carr JJ et al. (2013):The ERLIN1-CHUK-CWF19L1 gene cluster influences liver fat deposition and hepatic inflammation in the NHLBI Family Heart Study. *Atherosclerosis* 228, 175-180.

112. Zimmerman MA, Singh N, Martin PM, Thangaraju M, Ganapathy V, Waller JL et al. (2012):Butyrate suppresses colonic inflammation through HDAC1-dependent Fas upregulation



and Fas-mediated apoptosis of T cells. *American Journal of Physiology-Gastrointestinal and Liver Physiology* 302, G1405-G1415.

113. Ramirez-Carrozzi V, Ota N, Sambandam A, Wong K, Hackney J, Martinez-Martin N et al. (2019):Cutting Edge: IL-17B Uses IL-17RA and IL-17RB to Induce Type 2 Inflammation from Human Lymphocytes. *J Immunol* 202, 1935-1941.

114. Yang J, Wang L, Huang Y, Liu K, Lu C, Si N et al. (2020):Keratin 5-Cre-driven deletion of Ncstn in an acne inversa-like mouse model leads to a markedly increased IL-36a and Sprr2 expression. *Front Med* 14, 305-317.

115. Wang Y, Zhai WL, Yang YW (2020):Association between NDRG2/IL-6/STAT3 signaling pathway and diabetic retinopathy in rats. *European review for medical and pharmacological sciences* 24, 3476-3484.

116. McCullagh KJ, Calabria E, Pallafacchina G, Ciciliot S, Serrano AL, Argentini C et al. (2004):NFAT is a nerve activity sensor in skeletal muscle and controls activity-dependent myosin switching. *Proc Natl Acad Sci U S A* 101, 10590-10595.

117. Ho WJ, Law AMK, Masle-Farquhar E, Castillo LE, Mawson A, O'Bryan MK et al. (2022):Activation of the viral sensor oligoadenylate synthetase 2 (Oas2) prevents pregnancy-driven mammary cancer metastases. *Breast Cancer Res* 24, 31.

118. Gunes Günsel G, Conlon TM, Jeridi A, Kim R, Ertuz Z, Lang NJ et al. (2022):The arginine methyltransferase PRMT7 promotes extravasation of monocytes resulting in tissue injury in COPD. *Nat Commun* 13, 1303.

119. Console L, Scalise M, Tonazzi A, Giangregorio N, Indiveri C (2018):Characterization of Exosomal SLC22A5 (OCTN2) carnitine transporter. *Sci Rep* 8, 3758.

120. Roy M, Singh R (2021):TRIMs: selective recruitment at different steps of the NF-kappaB pathway-determinant of activation or resolution of inflammation. *Cell Mol Life Sci* 78, 6069-6086.

121. Yu Y, Li T (2021):Correlations between UBE2T Expression and Immune Infiltration in Different Cancers. 333-338.

122. Hong Y, Lee SO, Oh C, Kang K, Ryoo J, Kim D et al. (2021):USP21 Deubiquitinase Regulates AIM2 Inflammasome Activation. *J Immunol* 207, 1926-1936.

123. Langenhan T (2020):Adhesion G protein-coupled receptors-Candidate metabotropic mechanosensors and novel drug targets. *Basic Clin Pharmacol Toxicol* 126 Suppl 6, 5-16.

124. Piotrowska K, Sluczanska-Glabowska S, Kurzawski M, Dziedziejko V, Kopytko P, Paczkowska E et al. (2020):Over-Expression of Allograft Inflammatory Factor-1 (AIF-1) in Patients with Rheumatoid Arthritis. *Biomolecules* 10.

125. Fabrick BO, van Bruggen R, Deng DM, Ligtenberg AJ, Nazmi K, Schornagel K et al. (2009):The macrophage scavenger receptor CD163 functions as an innate immune sensor for

bacteria. *Blood* 113, 887-892.

126. Taschuk F, Cherry S (2020):DEAD-Box Helicases: Sensors, Regulators, and Effectors for Antiviral Defense. *Viruses* 12.

127. Steinle H, Ellwanger K, Mirza N, Briese S, Kienes I, Pfannstiel J et al. (2021):14-3-3 and erlin proteins differentially interact with RIPK2 complexes. *J Cell Sci* 134.

128. Plun-Favreau H, Klupsch K, Moisoï N, Gandhi S, Kjaer S, Frith D et al. (2007):The mitochondrial protease HtrA2 is regulated by Parkinson's disease-associated kinase PINK1. *Nature Cell Biology* 9, 1243-1252.

129. Celli J (2012):LRSAM1, an E3 Ubiquitin ligase with a sense for bacteria. *Cell Host Microbe* 12, 735-736.

130. Asghari Adib E, Shadrach JL, Reilly-Jankowiak L, Dwivedi MK, Rogers AE, Shahzad S et al. (2024):DLK signaling in axotomized neurons triggers complement activation and loss of upstream synapses. *Cell Rep* 43, 113801.

131. May O, Yatime L, Merle NS, Delguste F, Howsam M, Daugan MV et al. (2021):The receptor for advanced glycation end products is a sensor for cell-free heme. *FEBS J* 288, 3448-3464.

132. Yoh SM, Schneider M, Seifried J, Soonthornvacharin S, Akleh RE, Olivieri KC et al. (2015):PQBP1 Is a Proximal Sensor of the cGAS-Dependent Innate Response to HIV-1. *Cell* 161, 1293-1305.

133. Figley MD, Gu W, Nanson JD, Shi Y, Sasaki Y, Cunnea K et al. (2021):SARM1 is a metabolic sensor activated by an increased NMN/NAD(+) ratio to trigger axon degeneration. *Neuron* 109, 1118-1136 e1111.

134. Donowitz M, Ming Tse C, Fuster D (2013):SLC9/NHE gene family, a plasma membrane and organellar family of Na(+)/H(+) exchangers. *Mol Aspects Med* 34, 236-251.

135. Ainbinder A, Zhao L, Glover P, Gelinias-Roa K, Rusu V, Harney A et al. (2021):Mct11 deficiency alters hepatic glucose metabolism and energy homeostasis. *bioRxiv*.

136. Juskiewicz S, Chandrasekaran V, Lin Z, Kraatz S, Ramakrishnan V, Hegde RS (2018):ZNF598 Is a Quality Control Sensor of Collided Ribosomes. *Mol Cell* 72, 469-481 e467.

137. Matsui A, Tran M, Yoshida AC, Kikuchi SS, U M, Ogawa M et al. (2013):BTBD3 controls dendrite orientation toward active axons in mammalian neocortex. *Science* 342, 1114-1118.

138. Chen S, Li Z, Wang Y, Fan S (2022):BTN3A3 inhibits the proliferation, migration and invasion of ovarian cancer cells by regulating ERK1/2 phosphorylation. *Front Oncol* 12, 952425.

139. Woo MS, Ufer F, Sonner JK, Belkacemi A, Tintelnot J, Sáez PJ et al. (2023):Calcium channel  $\beta$ 3 subunit regulates ATP-dependent migration of dendritic cells. *Science advances* 9, eadh1653.

140. Shimazaki R, Takano S, Satoh M, Takada M, Miyahara Y, Sasaki K et al. (2021): Complement factor B regulates cellular senescence and is associated with poor prognosis in pancreatic cancer. *Cell Oncol (Dordr)* 44, 937-950.
141. Mucka P, Lindemann P, Bosco B, Willenbrock M, Radetzki S, Neuenschwander M et al. (2023): CLK2 and CLK4 are regulators of DNA damage-induced NF-kappaB targeted by novel small molecule inhibitors. *Cell Chem Biol* 30, 1303-1312 e1303.
142. Xu Y, Zhou X, Gao L, Yan S, Li Z, Zhang D et al. (2023): Identification of HAGHL as a novel metabolic oncogene regulating human colorectal cancer progression. *Clin Transl Oncol* 25, 1033-1042.
143. De Andrade Costa A, Chatterjee J, Cobb O, Sanapala S, Scheaffer S, Guo X et al. (2022): RNA sequence analysis reveals ITGAL/CD11A as a stromal regulator of murine low-grade glioma growth. *Neuro Oncol* 24, 14-26.
144. Wu L, Chen P, Ying J, Zhang Q, Liu F, Lv B et al. (2019): MAT2B mediates invasion and metastasis by regulating EGFR signaling pathway in hepatocellular carcinoma. *Clin Exp Med* 19, 535-546.
145. Shi Z, Xu S, Xing S, Yao K, Zhang L, Xue L et al. (2019): Mettl17, a regulator of mitochondrial ribosomal RNA modifications, is required for the translation of mitochondrial coding genes. *FASEB J* 33, 13040-13050.
146. Giridharan SS, Rohn JL, Naslavsky N, Caplan S (2012): Differential regulation of actin microfilaments by human MICAL proteins. *J Cell Sci* 125, 614-624.
147. Sekine H, Ferreira RC, Pan-Hammarstrom Q, Graham RR, Ziembra B, de Vries SS et al. (2007): Role for Msh5 in the regulation of Ig class switch recombination. *Proc Natl Acad Sci U S A* 104, 7193-7198.
148. Maravillas-Montero JL, Lopez-Ortega O, Patino-Lopez G, Santos-Argumedo L (2014): Myosin 1g regulates cytoskeleton plasticity, cell migration, exocytosis, and endocytosis in B lymphocytes. *Eur J Immunol* 44, 877-886.
149. Wang T, Nandakumar V, Jiang XX, Jones L, Yang AG, Huang XF et al. (2013): The control of hematopoietic stem cell maintenance, self-renewal, and differentiation by Mym1-mediated epigenetic regulation. *Blood* 122, 2812-2822.
150. Zhang N, Liu S, Xu J, Ning T, Xie S, Min L et al. (2022): PGM3 regulates beta-catenin activity to promote colorectal cancer cell progression. *Exp Biol Med (Maywood)* 247, 1518-1528.
151. Lehman N, Di Fulvio M, McCray N, Campos I, Tabatabaian F, Gomez-Cambronero J (2006): Phagocyte cell migration is mediated by phospholipases PLD1 and PLD2. *Blood* 108, 3564-3572.
152. Li C, Li SZ, Huang XC, Chen J, Liu W, Zhang XD et al. (2021): PTPN18 promotes

colorectal cancer progression by regulating the c-MYC-CDK4 axis. *Genes Dis* 8, 838-848.

153. Huang H, Ouyang Q, Mei K, Liu T, Sun Q, Liu W et al. (2023):Acetylation of SCFD1 regulates SNARE complex formation and autophagosome-lysosome fusion. *Autophagy* 19, 189-203.

154. Hatsuzawa K, Sakurai C (2020):Regulatory Mechanism of SNAP23 in Phagosome Formation and Maturation. *Yonago Acta Med* 63, 135-145.

155. Torres JZ, Summers MK, Peterson D, Brauer MJ, Lee J, Senese S et al. (2011):The STARD9/Kif16a kinesin associates with mitotic microtubules and regulates spindle pole assembly. *Cell* 147, 1309-1323.

156. Zhao X, Chen Q, Cai Y, Chen D, Bei M, Dong H et al. (2021):TRA2A Binds With LncRNA MALAT1 To Promote Esophageal Cancer Progression By Regulating EZH2/beta-catenin Pathway. *J Cancer* 12, 4883-4890.

(A) (i)

| sample ID     | Individual | sex | age | BDI-II score    |                |
|---------------|------------|-----|-----|-----------------|----------------|
|               |            |     |     | before medicine | after medicine |
| CON-1         | COI04      | M   | 40s | 7               | -              |
| CON-2         | COI20      | M   | 40s | 7               | -              |
| CON-3         | COI23      | F   | 20s | 9               | -              |
| CON-4         | COI06      | F   | 40s | 13              | -              |
| CON-5         | COI07      | M   | 40s | 16              | -              |
| CON-6         | COI21      | M   | 30s | 16              | -              |
| BMT-1 & AMT-1 | COI08      | F   | 30s | 17              | 6              |
| BMT-2 & AMT-2 | COI18      | F   | 40s | 18              | 8              |
| BMT-3 & AMT-3 | COI22      | F   | 20s | 21              | 12             |
| BMT-4 & AMT-4 | COI02      | M   | 30s | 22              | 21             |
| BMT-5 & AMT-5 | COI01      | F   | 50s | 23              | 11             |
| BMT-6 & AMT-6 | COI12      | M   | 30s | 25              | 9              |
| BMT-7 & AMT-7 | COI14      | M   | 50s | 27              | 0              |
| BMT-8 & AMT-8 | COI19      | F   | 30s | 27              | 18             |

(ii)

|                                    | CON          | BMT          | AMT          |
|------------------------------------|--------------|--------------|--------------|
| N                                  | 6            | 8            |              |
| gender                             | M4 : F2      | M3 : F5      |              |
| Age at the 1st medical examination | 40.67 ± 6.52 | 40.38 ± 9.04 |              |
| BDI-II score                       | 11.33 ± 3.86 | 22.50 ± 3.54 | 10.63 ± 6.20 |

(C)

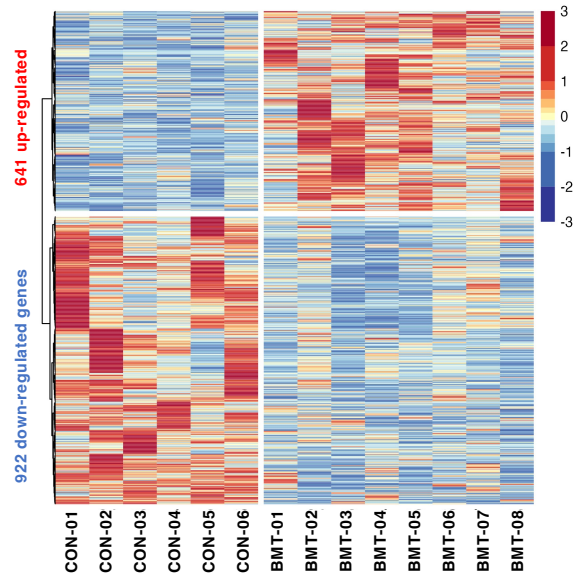

(D)

up-regulation

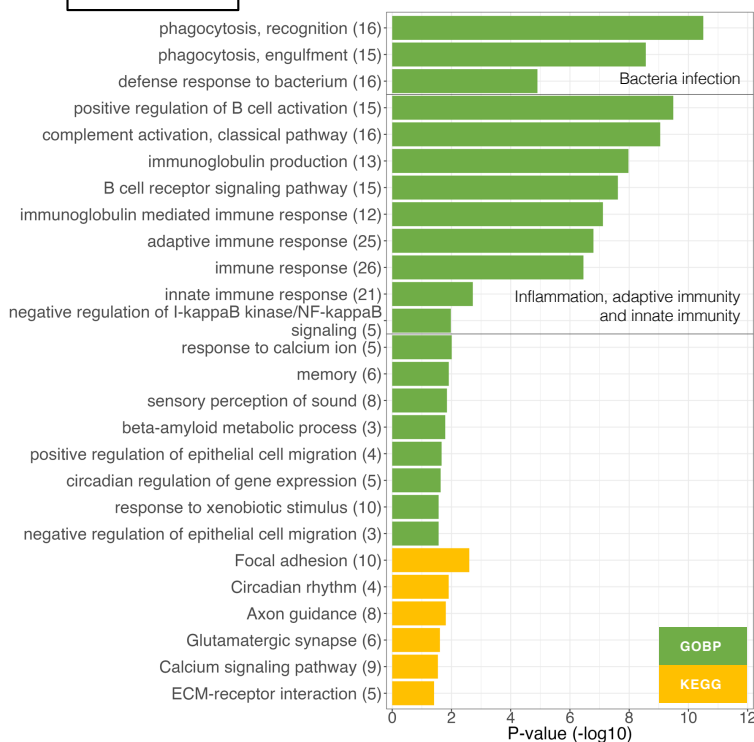

(B)

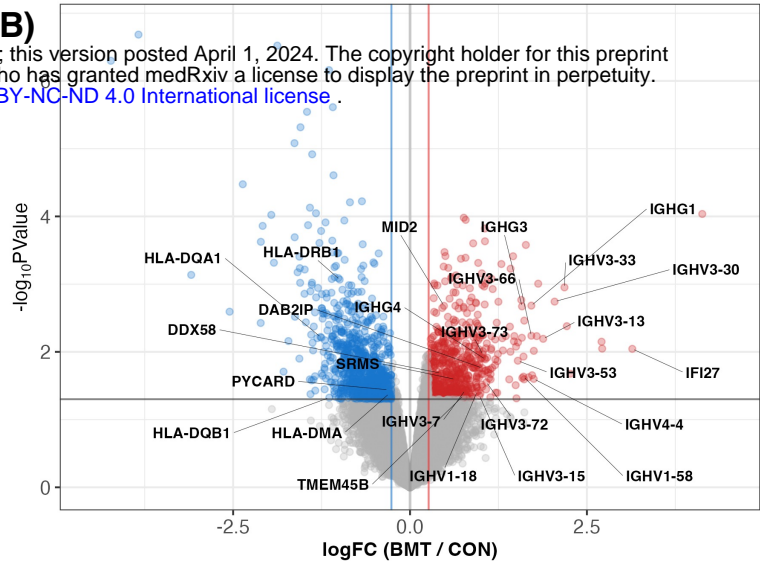

(E)

down-regulation

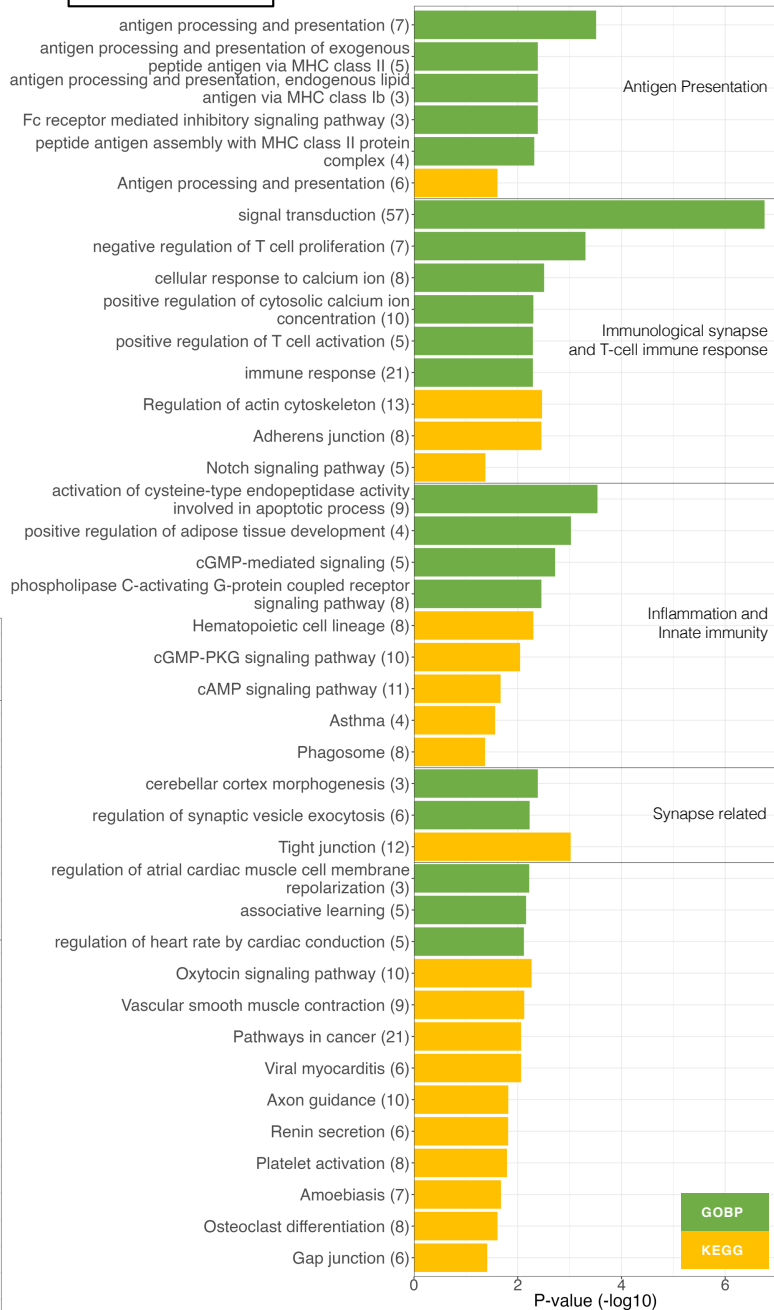

(A)

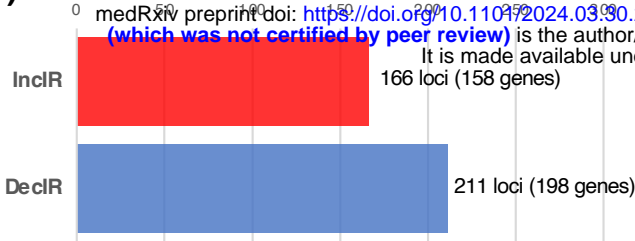

(B)

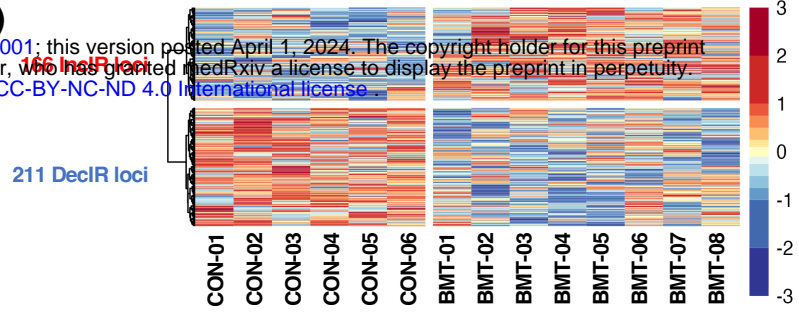

(C)

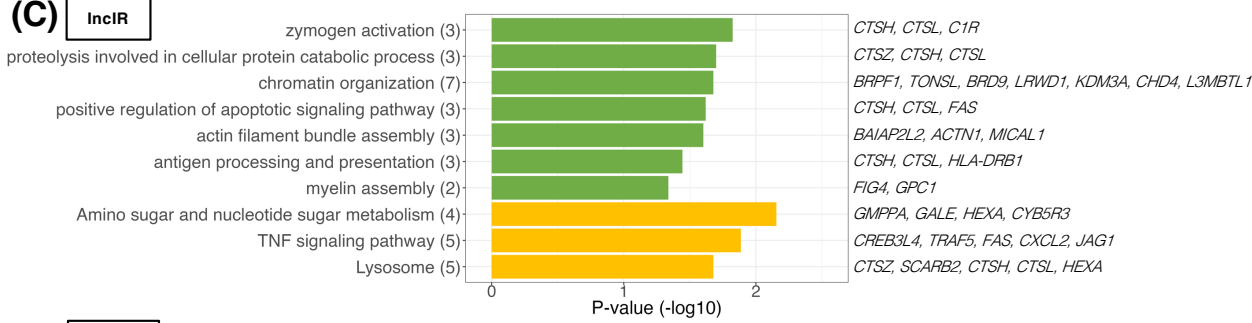

(D)

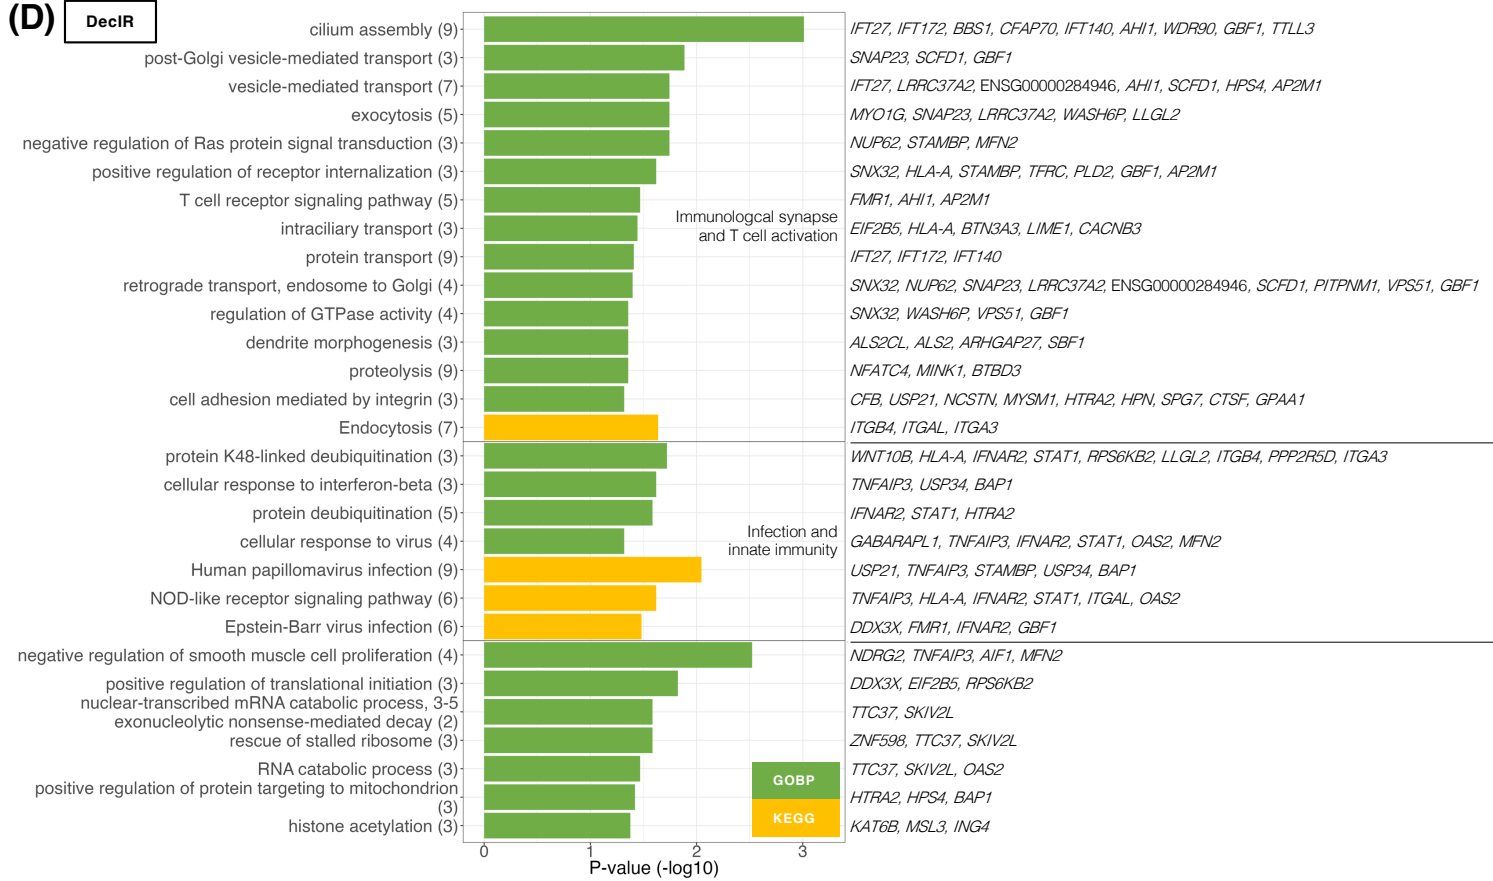

**(A) Number of protein-coding IncIR + DeclR genes**

|       | numLoci | numGenes | numProtein-coding |
|-------|---------|----------|-------------------|
| IncIR | 196     | 199      | 187               |
| DeclR | 211     | 198      | 180               |

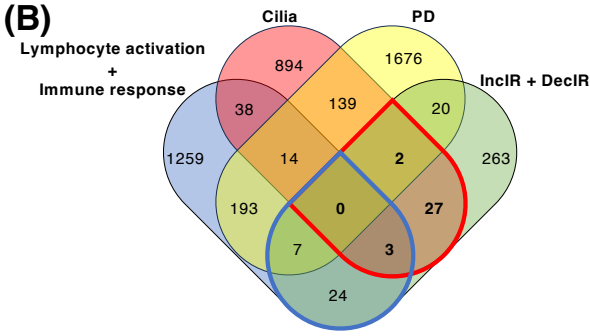**(C) Shared between Cilia and IncIR + DeclR**

**(32 genes)**

|         |       |
|---------|-------|
| CELSR2  | InclR |
| CFAP119 | InclR |
| INVS    | InclR |
| KDM3A   | InclR |
| KIF5A   | InclR |
| MYH10   | InclR |
| NPHP4   | InclR |
| PQB1    | InclR |
| TMEM107 | InclR |
| CCDC78  | Mixed |
| GBF1    | Mixed |

**(D) Shared between Lymphocyte activation + Immune response and IncIR + DeclR (34 genes)**

|          |       |
|----------|-------|
| CARD8    | InclR |
| CERT1    | InclR |
| CTSH     | InclR |
| CTSL     | InclR |
| CXCL2    | InclR |
| FAS      | InclR |
| G3BP1    | InclR |
| GBP3     | InclR |
| HLA-DRB1 | InclR |
| JAG1     | InclR |
| POLR3A   | InclR |
| PQB1     | InclR |
| GBF1     | Mixed |

**(E)**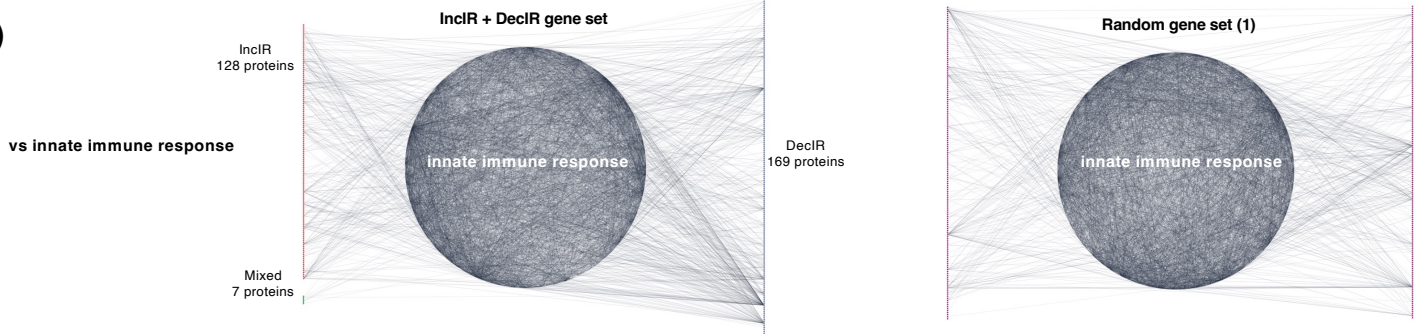**(F)**

| Rank | IR       | Group | numLinks |
|------|----------|-------|----------|
| 1    | STAT1    | DeclR | 104      |
| 2    | HLA-A    | DeclR | 46       |
| 3    | OAS2     | DeclR | 46       |
| 4    | IFNAR2   | DeclR | 34       |
| 5    | DDX3X    | DeclR | 23       |
| 6    | CXCL2    | InclR | 20       |
| 7    | FAS      | InclR | 20       |
| 8    | CD163    | DeclR | 19       |
| 9    | SNAP23   | DeclR | 17       |
| 10   | C1S      | InclR | 17       |
| 11   | TNFAIP3  | DeclR | 16       |
| 12   | C1R      | InclR | 16       |
| 13   | HLA-DRB1 | InclR | 14       |
| 14   | CHD4     | InclR | 14       |
| 15   | DDX5     | DeclR | 13       |
| 16   | CFB      | DeclR | 13       |
| 17   | CARD8    | InclR | 13       |
| 18   | TRAF5    | InclR | 13       |
| 19   | EZH2     | DeclR | 12       |
| 20   | PPP2R5D  | DeclR | 12       |
| 21   | DLG4     | DeclR | 11       |
| 22   | SARM1    | DeclR | 11       |
| 23   | CALM3    | InclR | 10       |
| 24   | RPL23    | DeclR | 9        |
| 25   | SPG7     | DeclR | 9        |
| 26   | MYH10    | InclR | 9        |
| 27   | ACTN1    | InclR | 9        |
| 28   | GPC1     | InclR | 9        |
| 29   | NUP85    | InclR | 9        |
| 30   | POLR3A   | InclR | 9        |

**(G)**

| Rank | Random1 | numLinks | Random2 | numLinks | Random3   | numLinks | Random4  | numLinks | Random5 | numLinks |
|------|---------|----------|---------|----------|-----------|----------|----------|----------|---------|----------|
| 1    | HRAS    | 43       | TRAF2   | 42       | IL6       | 77       | AKT1     | 59       | SYK     | 53       |
| 2    | IFITM3  | 33       | UBE2D2  | 32       | IRF2      | 46       | IRF1     | 57       | EP300   | 51       |
| 3    | IL1A    | 29       | UBE2I   | 26       | TRAF3     | 44       | NFKB1    | 54       | IP6K2   | 34       |
| 4    | NRAS    | 26       | DEFB114 | 24       | GRB2      | 44       | STAT2    | 54       | IF44L   | 29       |
| 5    | TAB2    | 26       | DEFB128 | 24       | GBP2      | 38       | DEFB1    | 31       | ALB     | 26       |
| 6    | IL10RB  | 22       | CASP3   | 23       | IFITM3    | 34       | DEFB135  | 24       | IRS1    | 19       |
| 7    | PIK3CD  | 19       | C2      | 21       | TICAM1    | 26       | NOS2     | 19       | C1S     | 17       |
| 8    | LRRK2   | 16       | LILRB2  | 18       | DDX60     | 26       | RPL11    | 18       | HCST    | 13       |
| 9    | VAMP2   | 15       | HSPD1   | 18       | RTP4      | 24       | ITGAV    | 18       | MAP3K5  | 12       |
| 10   | PSMD4   | 14       | AKT2    | 16       | RACK1     | 23       | AIM2     | 17       | DNM2    | 11       |
| 11   | GRAP2   | 14       | CARD8   | 13       | FCGR2B    | 20       | KLRD1    | 16       | EFNA1   | 10       |
| 12   | BDNF    | 14       | LY86    | 11       | PIK3R2    | 18       | IL12RB2  | 16       | TNRC6B  | 9        |
| 13   | GNG2    | 14       | POLR2K  | 11       | RPS23     | 17       | ITCH     | 15       | EPHA5   | 9        |
| 14   | PSME3   | 12       | PRKCE   | 10       | RPSA      | 17       | RB1      | 14       | CX3CL1  | 9        |
| 15   | RPL23   | 11       | CD59    | 10       | MAPK13    | 15       | MAPK12   | 13       | TBL1XR1 | 9        |
| 16   | NFKBIE  | 10       | CTSS    | 10       | TBX21     | 14       | HNRNPK   | 13       | WDR43   | 9        |
| 17   | PSME4   | 9        | POLR3G  | 9        | HTT       | 14       | PKM      | 12       | ERN1    | 9        |
| 18   | RNF4    | 9        | STX17   | 9        | RPL26     | 14       | SELL     | 11       | DLG1    | 9        |
| 19   | DDX17   | 8        | CAT     | 9        | RPS17     | 13       | PRKCE    | 11       | TBL3    | 9        |
| 20   | STX16   | 8        | RPL8    | 9        | RPL27     | 13       | KDMA1    | 11       | NCOA2   | 8        |
| 21   | WRN     | 8        | PARP2   | 8        | RPL21     | 13       | MAP1LC3B | 10       | NIFK    | 8        |
| 22   | BAG4    | 7        | MYO6    | 8        | LILRB1    | 13       | POLR3GL  | 10       | RPS27   | 8        |
| 23   | SORT1   | 7        | RPL10A  | 8        | ETS1      | 11       | NMD3     | 9        | ITGA5   | 7        |
| 24   | TSPAN33 | 7        | MSH6    | 7        | ILF2      | 11       | RPS14    | 9        | AIF1    | 7        |
| 25   | GSPT1   | 7        | STX10   | 6        | POLD1     | 11       | MCL1     | 9        | RPL7    | 7        |
| 26   | UPF1    | 6        | SND1    | 6        | MLH1      | 10       | EFNA1    | 9        | KMT2A   | 7        |
| 27   | SND1    | 6        | BAG4    | 6        | CCDC124   | 10       | CDK2     | 9        | RBBP5   | 7        |
| 28   | ERVW-1  | 6        | PIP5K1B | 6        | ERC1      | 10       | ATR      | 9        | ACTN4   | 6        |
| 29   | HNRNPD  | 6        | UNC93B1 | 6        | TNFRSF13C | 10       | FABP1    | 8        | VDR     | 6        |
| 30   | RPL22   | 6        | CD33    | 6        | PLEK      | 9        | PKLR     | 8        | GRIA4   | 5        |

**(H)**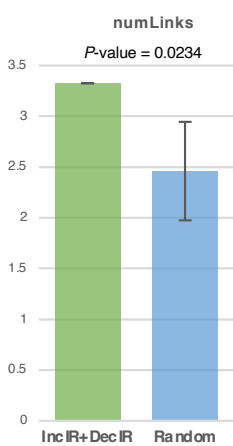**(I)**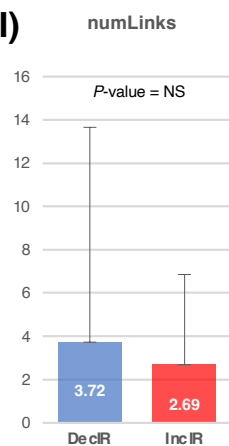**(J) vs Lymphocyte activation**

| Rank | IR       | Group | numLinks |
|------|----------|-------|----------|
| 1    | STAT1    | DeclR | 62       |
| 2    | HLA-A    | DeclR | 34       |
| 3    | HLA-DRB1 | InclR | 30       |
| 4    | IFNAR2   | DeclR | 26       |
| 5    | ITGAL    | DeclR | 20       |
| 6    | FAS      | InclR | 20       |
| 7    | EZH2     | DeclR | 18       |
| 8    | PPP2R5D  | DeclR | 13       |
| 9    | ERCC8    | DeclR | 13       |
| 10   | CXCL2    | InclR | 12       |
| 11   | CHD4     | InclR | 12       |
| 12   | JAG1     | InclR | 12       |
| 13   | CD163    | DeclR | 12       |
| 14   | RAD52    | DeclR | 11       |
| 15   | DLG4     | DeclR | 11       |
| 16   | PMS2     | InclR | 10       |
| 17   | NCSTN    | DeclR | 10       |
| 18   | ITGB4    | DeclR | 10       |
| 19   | TFRC     | DeclR | 10       |
| 20   | DDX5     | DeclR | 9        |
| 21   | ITGA3    | DeclR | 9        |
| 22   | ACTN1    | InclR | 9        |
| 23   | WNT10B   | DeclR | 9        |
| 24   | OAS2     | DeclR | 9        |
| 25   | SMC4     | DeclR | 8        |
| 26   | AP2M1    | DeclR | 8        |
| 27   | PLD2     | DeclR | 7        |
| 28   | SPG7     | DeclR | 7        |
| 29   | TNFAIP3  | DeclR | 7        |
| 30   | NUP62    | DeclR | 6        |

**(K) vs immune response**

| Rank | IR       | Group | numLinks |
|------|----------|-------|----------|
| 1    | STAT1    | DeclR | 148      |
| 2    | HLA-A    | DeclR | 90       |
| 3    | HLA-DRB1 | InclR | 53       |
| 4    | OAS2     | DeclR | 51       |
| 5    | CXCL2    | InclR | 50       |
| 6    | IFNAR2   | DeclR | 41       |
| 7    | CD163    | DeclR | 33       |
| 8    | FAS      | InclR | 30       |
| 9    | ITGAL    | DeclR | 24       |
| 10   | SNAP23   | DeclR | 23       |
| 11   | DDX3X    | DeclR | 23       |
| 12   | TRAF5    | InclR | 23       |
| 13   | TNFAIP3  | DeclR | 21       |
| 14   | ITGB4    | DeclR | 20       |
| 15   | ITGA3    | DeclR | 19       |
| 16   | EZH2     | DeclR | 18       |
| 17   | DLG4     | DeclR | 17       |
| 18   | PPP2R5D  | DeclR | 17       |
| 19   | CHD4     | InclR | 17       |
| 20   | C1S      | InclR | 17       |
| 21   | TFRC     | DeclR | 16       |
| 22   | CFB      | DeclR | 16       |
| 23   | C1R      | InclR | 16       |
| 24   | CTSL     | InclR | 16       |
| 25   | AIF1     | DeclR | 15       |
| 26   | DDX5     | DeclR | 15       |
| 27   | RAD52    | DeclR | 14       |
| 28   | RPL23    | DeclR | 13       |
| 29   | PLD2     | DeclR | 13       |
| 30   | AP2M1    | DeclR | 13       |

**(A)**

medRxiv preprint doi: <https://doi.org/10.1101/2024.03.30.24305001>; this version posted April 1, 2024. The copyright holder for this preprint (which was not certified by peer review) is the author/funder, who has granted medRxiv a license to display the preprint in perpetuity. It is made available under a [CC-BY-NC-ND 4.0 International license](https://creativecommons.org/licenses/by-nc-nd/4.0/).

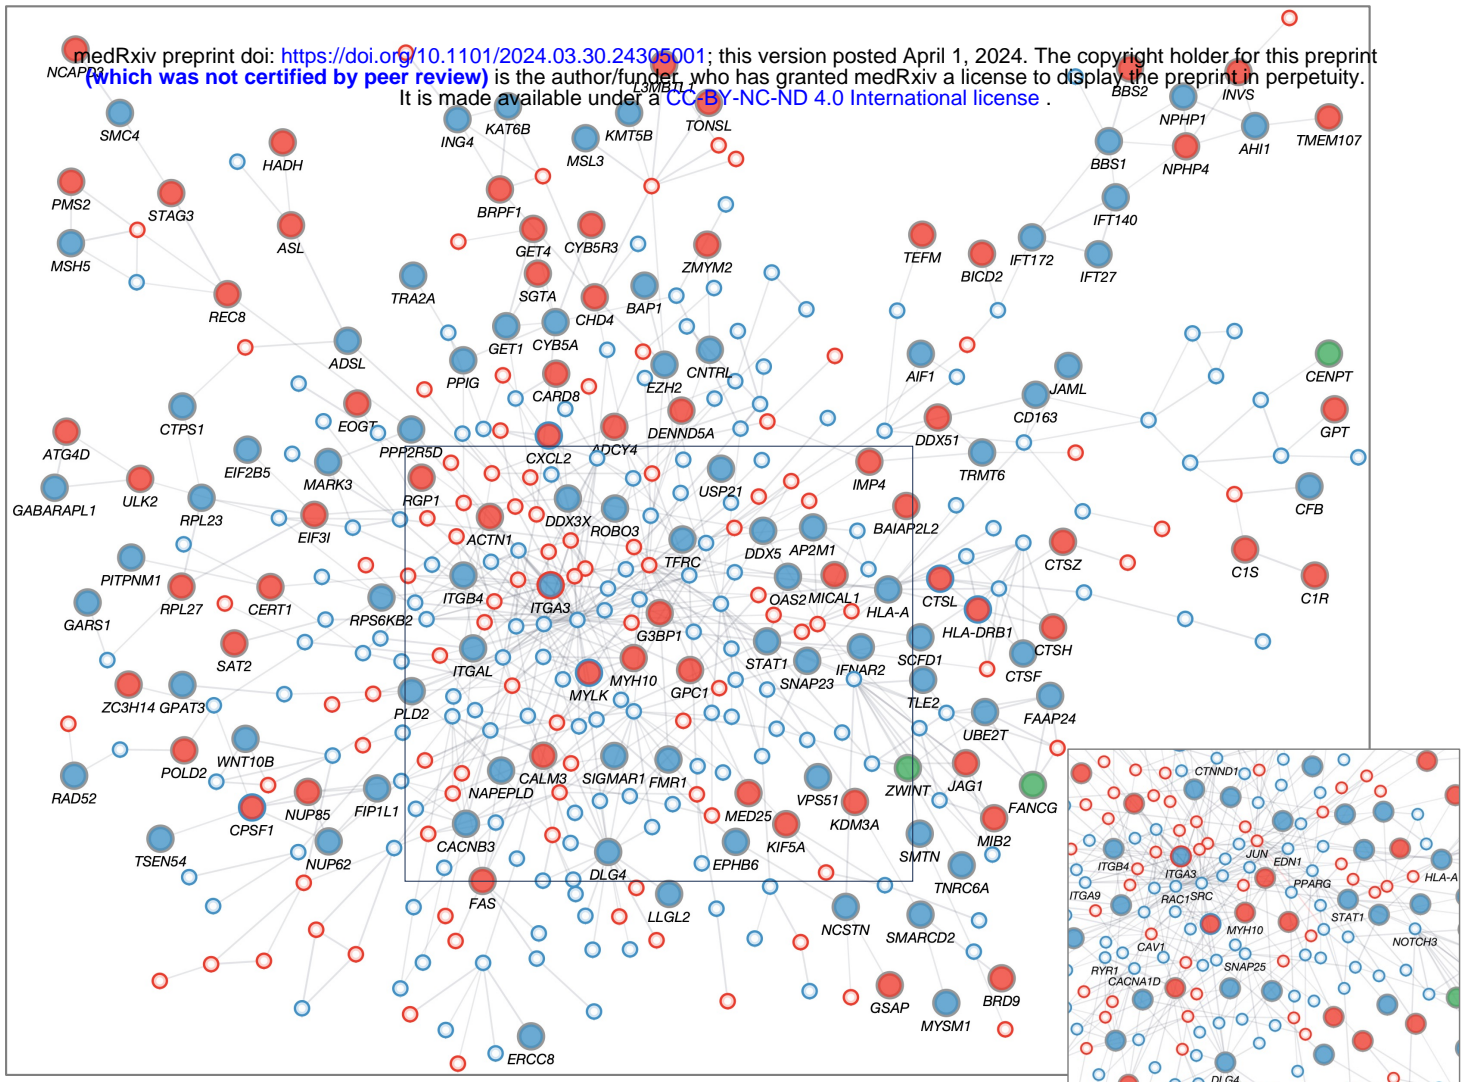**(B)**

| symbol         | numLinks | IR               | DEG             |
|----------------|----------|------------------|-----------------|
| <i>SRC</i>     | 43       |                  | down-regulation |
| <i>RAC1</i>    | 25       |                  | down-regulation |
| <i>DLG4</i>    | 18       | DeclR            |                 |
| <i>CAV1</i>    | 16       |                  | up-regulation   |
| <i>JUN</i>     | 16       |                  | up-regulation   |
| <i>CTNND1</i>  | 15       |                  | down-regulation |
| <i>SNAP25</i>  | 15       |                  | down-regulation |
| <i>STAT1</i>   | 14       | DeclR            |                 |
| <i>ITGB4</i>   | 13       | DeclR            |                 |
| <i>PPARG</i>   | 13       |                  | down-regulation |
| <i>CACNA1D</i> | 12       |                  | down-regulation |
| <i>HLA-A</i>   | 12       | DeclR            |                 |
| <i>EDN1</i>    | 11       |                  | down-regulation |
| <i>ITGA3</i>   | 11       | DeclR            | up-regulation   |
| <i>MYH10</i>   | 11       | InclR (recovery) |                 |
| <i>ITGA9</i>   | 10       |                  | down-regulation |
| <i>NOTCH3</i>  | 10       |                  | down-regulation |
| <i>RYR1</i>    | 10       |                  | down-regulation |

**(C)**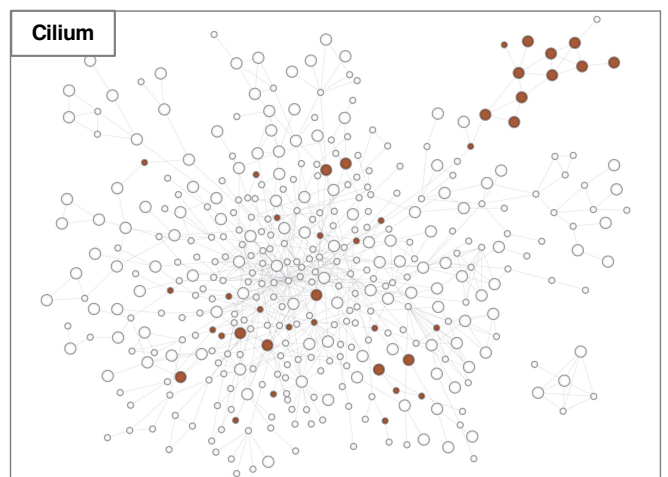**(D)**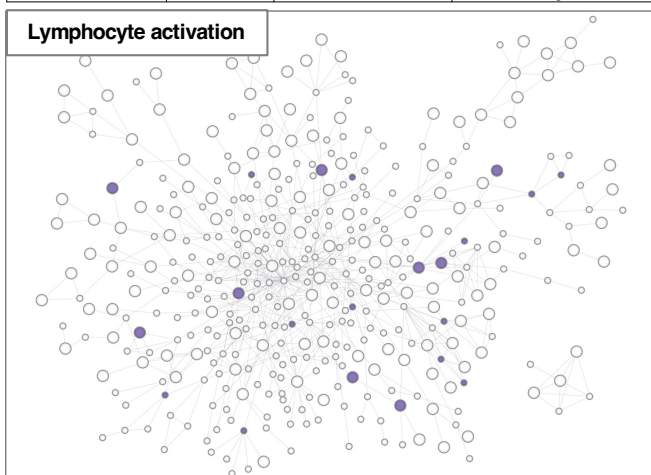**(E)**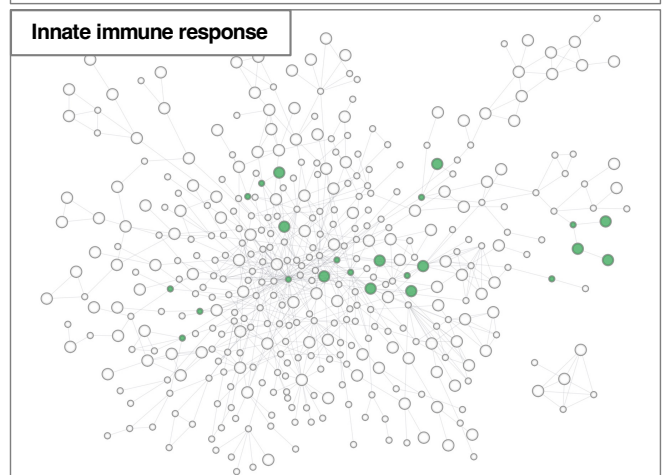



(A)

IncCON-BKT (166 loci)

DecBKT-AKT (143 loci)

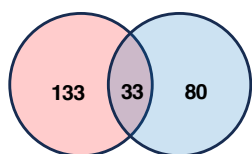

reverse  
V-shape  
33 loci,  
33 genes,  
30 protein-  
coding

*ADCY4, ALG5, BRD9, C21orf58, CCHCR1, CDCA3, CDIN1, CELSR2, CENPT, CERT1, CXCL2, EOGT, FAM153A, FAS, GBA1LP, GBF1, GMPPA, IL17RB, LIMS2, LINC03049, MYH10, MYLK, PMS2, POLR3A, REC8, RGP1, SKIC3, SNHG17, TEFM, TRIM16, TVP23C, ZNF714, ZNF789*

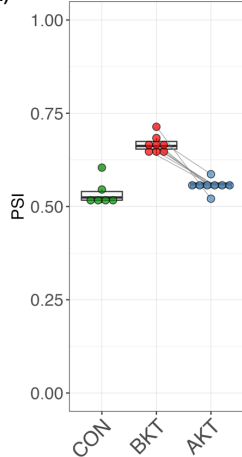

(B)

DecCON-BKT (211 loci)

IncBKT-AKT (109 loci)

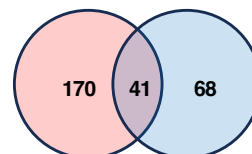

V-shape  
41 loci,  
39 genes,  
34 protein-  
coding

*ABHD14A-ACY1, AHI1, AP2M1, ATXN7L2, BCKDK, CCDC24, CEP104, DDX5, DNHD1, ERLIN1, FAM131B, FOXRED1, KMT5B, LINC01569, MFN2, NAPEPLD, NCSTN, NDRG2, NDUFA5, NFATC4, NOSIP, NPHP1, OAS2, PCSK4, PRMT7, ROBO3, SIGMAR1, SLC22A5, SMARCD2, SMC4, SPG7, STX18-AS1, TMEM25, UBE2T, USP21, ZFAND2A-DT, ZNF37BP, ZWINT, ENSG00000284946*

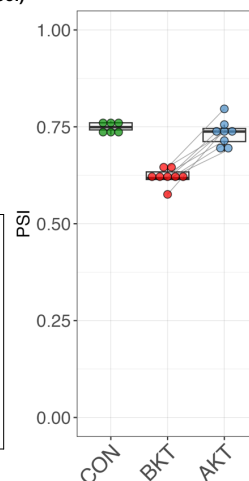

(C)

| Functional category      | Gene           | IR V shape | IR reverse -V                                                                                                                                       | Description                                                                                                                                                                                                                                | Ref.  |
|--------------------------|----------------|------------|-----------------------------------------------------------------------------------------------------------------------------------------------------|--------------------------------------------------------------------------------------------------------------------------------------------------------------------------------------------------------------------------------------------|-------|
| Erythropoiesis           | <i>CDIN1</i>   |            | ✓                                                                                                                                                   | The congenital dyserythropoietic anemias: genetics and pathophysiology                                                                                                                                                                     | (97)  |
|                          | <i>EOGT</i>    |            | ✓                                                                                                                                                   | Synergistic regulation of Notch signaling by different O-glycans promotes hematopoiesis                                                                                                                                                    | (95)  |
|                          | <i>SMARCD2</i> | ✓          |                                                                                                                                                     | A <i>SMARCD2</i> -containing m SWI/ SNF complex is required for granulopoiesis                                                                                                                                                             | (98)  |
| DNArepair, recombination | <i>PMS2</i>    |            | ✓                                                                                                                                                   | Elevated levels of mutation in multiple tissues of mice deficient in the DNA mismatch repair gene <i>Pms2</i>                                                                                                                              | (99)  |
|                          | <i>REC8</i>    |            | ✓                                                                                                                                                   | Meiotic prophase roles of <i>Rec8</i> in crossover recombination and chromosome structure                                                                                                                                                  | (100) |
| Cilia                    | <i>AHI1</i>    | ✓          |                                                                                                                                                     | <i>AHI1</i> , whose human ortholog is mutated in Joubert syndrome, is required for Rab8a localization, ciliogenesis and vesicle trafficking                                                                                                | (59)  |
|                          | <i>CELSR2</i>  |            | ✓                                                                                                                                                   | <i>CELSR2</i> , Encoding a Planar Cell Polarity Protein, is a Putative Gene in Joubert Syndrome with Cortical Heterotopia, Microphthalmia, and Growth Hormone Deficiency                                                                   | (60)  |
|                          | <i>CEP104</i>  | ✓          |                                                                                                                                                     | Joubert Syndrome in French Canadians and Identification of Mutations in <i>CEP104</i>                                                                                                                                                      | (61)  |
|                          | <i>DNHD1</i>   | ✓          |                                                                                                                                                     | Bi-allelic variants in <i>DNHD1</i> cause flagellar axoneme defects and asthenoteratozoospermia in humans and mice                                                                                                                         | (101) |
|                          | <i>GBF1</i>    |            | ✓                                                                                                                                                   | The Arf GEF <i>GBF1</i> and ARF4 synergize with the sensory receptor cargo, rhodopsin, to regulate ciliary membrane trafficking                                                                                                            | (102) |
|                          | <i>NAPEPLD</i> | ✓          |                                                                                                                                                     | Small Molecule Activation of NAPE-PLD Enhances Efferocytosis by Macrophages                                                                                                                                                                | (80)  |
| Mitochondria             | <i>NPHP1</i>   | ✓          |                                                                                                                                                     | Many Genes—One Disease? Genetics of Nephronophthisis (NPHP) and NPHP-Associated Disorders                                                                                                                                                  | (67)  |
|                          | <i>FOXRED1</i> | ✓          |                                                                                                                                                     | Characterization of mitochondrial <i>FOXRED1</i> in the assembly of respiratory chain complex I                                                                                                                                            | (72)  |
|                          | <i>MFN2</i>    | ✓          |                                                                                                                                                     | Mitofusin 2 ( <i>MFN2</i> ) links mitochondrial and endoplasmic reticulum function with insulin signaling and is essential for normal glucose homeostasis                                                                                  | (103) |
|                          | <i>MYH10</i>   |            | ✓                                                                                                                                                   | Actin and myosin contribute to mammalian mitochondrial DNA maintenance                                                                                                                                                                     | (45)  |
|                          | <i>NDUFA5</i>  | ✓          |                                                                                                                                                     | Supernumerary subunits <i>NDUFA3</i> , <i>NDUFA5</i> and <i>NDUFA12</i> are required for the formation of the extramembrane arm of human mitochondrial complex I                                                                           | (72)  |
|                          | <i>SIGMAR1</i> | ✓          |                                                                                                                                                     | The role of <i>SIGMAR1</i> gene mutation and mitochondrial dysfunction in amyotrophic lateral sclerosis                                                                                                                                    | (104) |
| Inflammation             | <i>SPG7</i>    | ✓          |                                                                                                                                                     | <i>SPG7</i> is an Essential and Conserved Component of the Mitochondrial Permeability Transition Pore                                                                                                                                      | (105) |
|                          | <i>TEFM</i>    |            | ✓                                                                                                                                                   | <i>TEFM</i> (c17orf42) is necessary for transcription of human mtDNA                                                                                                                                                                       | (106) |
|                          | <i>ADCY4</i>   |            | ✓                                                                                                                                                   | cAMP metabolism controls caspase-11 inflammasome activation and pyroptosis in sepsis                                                                                                                                                       | (107) |
|                          | <i>BRD9</i>    |            | ✓                                                                                                                                                   | Bromodomain containing 9 ( <i>BRD9</i> ) regulates macrophage inflammatory responses by potentiating glucocorticoid receptor activity                                                                                                      | (93)  |
|                          | <i>CDCA3</i>   |            | ✓                                                                                                                                                   | <i>CDCA3</i> promotes cell proliferation by activating the NF-κB/cyclin D1 signaling pathway in colorectal cancer                                                                                                                          | (108) |
|                          | <i>CERT1</i>   |            | ✓                                                                                                                                                   | Ceramides as Mediators of Oxidative Stress and Inflammation in Cardiometabolic Disease                                                                                                                                                     | (85)  |
|                          | <i>CXCL2</i>   |            | ✓                                                                                                                                                   | NF-κB and <i>STAT1</i> control <i>CXCL1</i> and <i>CXCL2</i> gene transcription                                                                                                                                                            | (109) |
|                          | <i>DDX5</i>    | ✓          |                                                                                                                                                     | IL-17D-induced inhibition of <i>DDX5</i> expression in keratinocytes amplifies IL-36R-mediated skin inflammation                                                                                                                           | (110) |
|                          | <i>ERLIN1</i>  | ✓          |                                                                                                                                                     | The <i>ERLIN1-CHUK-CWF19L1</i> gene cluster influences liver fat deposition and hepatic inflammation in the NHLBI Family Heart Study                                                                                                       | (111) |
|                          | <i>FAS</i>     |            | ✓                                                                                                                                                   | The Many Roles of <i>FAS</i> Receptor Signaling in the Immune System                                                                                                                                                                       | (112) |
|                          | <i>IL17RB</i>  |            | ✓                                                                                                                                                   | Cutting Edge: IL-17B Uses IL-17RA and IL-17RB to Induce Type 2 inflammation from Human Lymphocytes                                                                                                                                         | (113) |
|                          | <i>MYLK</i>    |            | ✓                                                                                                                                                   | Myosin Light Chain Kinase: A Potential Target for Treatment of Inflammatory Diseases                                                                                                                                                       | (47)  |
|                          | <i>NCSTN</i>   | ✓          |                                                                                                                                                     | Keratin 5-Cre-driven deletion of <i>NCSTN</i> in an acne inversa-like mouse model leads to a markedly increased IL-36a and <i>SPRR2</i> expression                                                                                         | (114) |
|                          | <i>NDRG2</i>   | ✓          |                                                                                                                                                     | Association between <i>NDRG2/IL-6/STAT3</i> signaling pathway and diabetic retinopathy in rats                                                                                                                                             | (115) |
|                          | <i>NFATC4</i>  | ✓          |                                                                                                                                                     | <i>NFAT</i> is a nerve activity sensor in skeletal muscle and controls activity-dependent myosin switching                                                                                                                                 | (116) |
|                          | <i>NOSIP</i>   | ✓          |                                                                                                                                                     | <i>NOSIP</i> , a novel modulator of endothelial nitric oxide synthase activity                                                                                                                                                             | (44)  |
|                          | <i>OAS2</i>    | ✓          |                                                                                                                                                     | <i>OAS1</i> , <i>OAS2</i> , and <i>OAS3</i> Contribute to Epidermal Keratinocyte Proliferation by Regulating Cell Cycle and Augmenting IFN-1- induced Jak1-Signal Transducer and Activator of Transcription 1 Phosphorylation in Psoriasis | (117) |
|                          | <i>PRMT7</i>   | ✓          |                                                                                                                                                     | The Role of Protein Arginine Methyltransferases in Inflammatory Responses                                                                                                                                                                  | (118) |
|                          | <i>ROBO3</i>   | ✓          |                                                                                                                                                     | Axon guidance receptor <i>ROBO3</i> modulates subtype identity and prognosis via AXL-associated inflammatory network in pancreatic cancer                                                                                                  | (89)  |
|                          | <i>SLC22A5</i> | ✓          |                                                                                                                                                     | Characterisation of exosomal <i>SLC22A5</i> ( <i>OCTN2</i> ) carnitine transporter                                                                                                                                                         | (119) |
| <i>TRIM16</i>            |                | ✓          | <i>TRIM16</i> exerts protective function on myocardial ischemia/reperfusion injury through reducing pyroptosis and inflammation via NLRP3 signaling | (120)                                                                                                                                                                                                                                      |       |
| <i>UBE2T</i>             | ✓              |            | Correlations between <i>UBE2T</i> Expression and Immune Infiltration in Different Cancers                                                           | (121)                                                                                                                                                                                                                                      |       |
| <i>USP21</i>             | ✓              |            | <i>USP21</i> Deubiquitinase Regulates AIM2 Inflammasome Activation                                                                                  | (122)                                                                                                                                                                                                                                      |       |

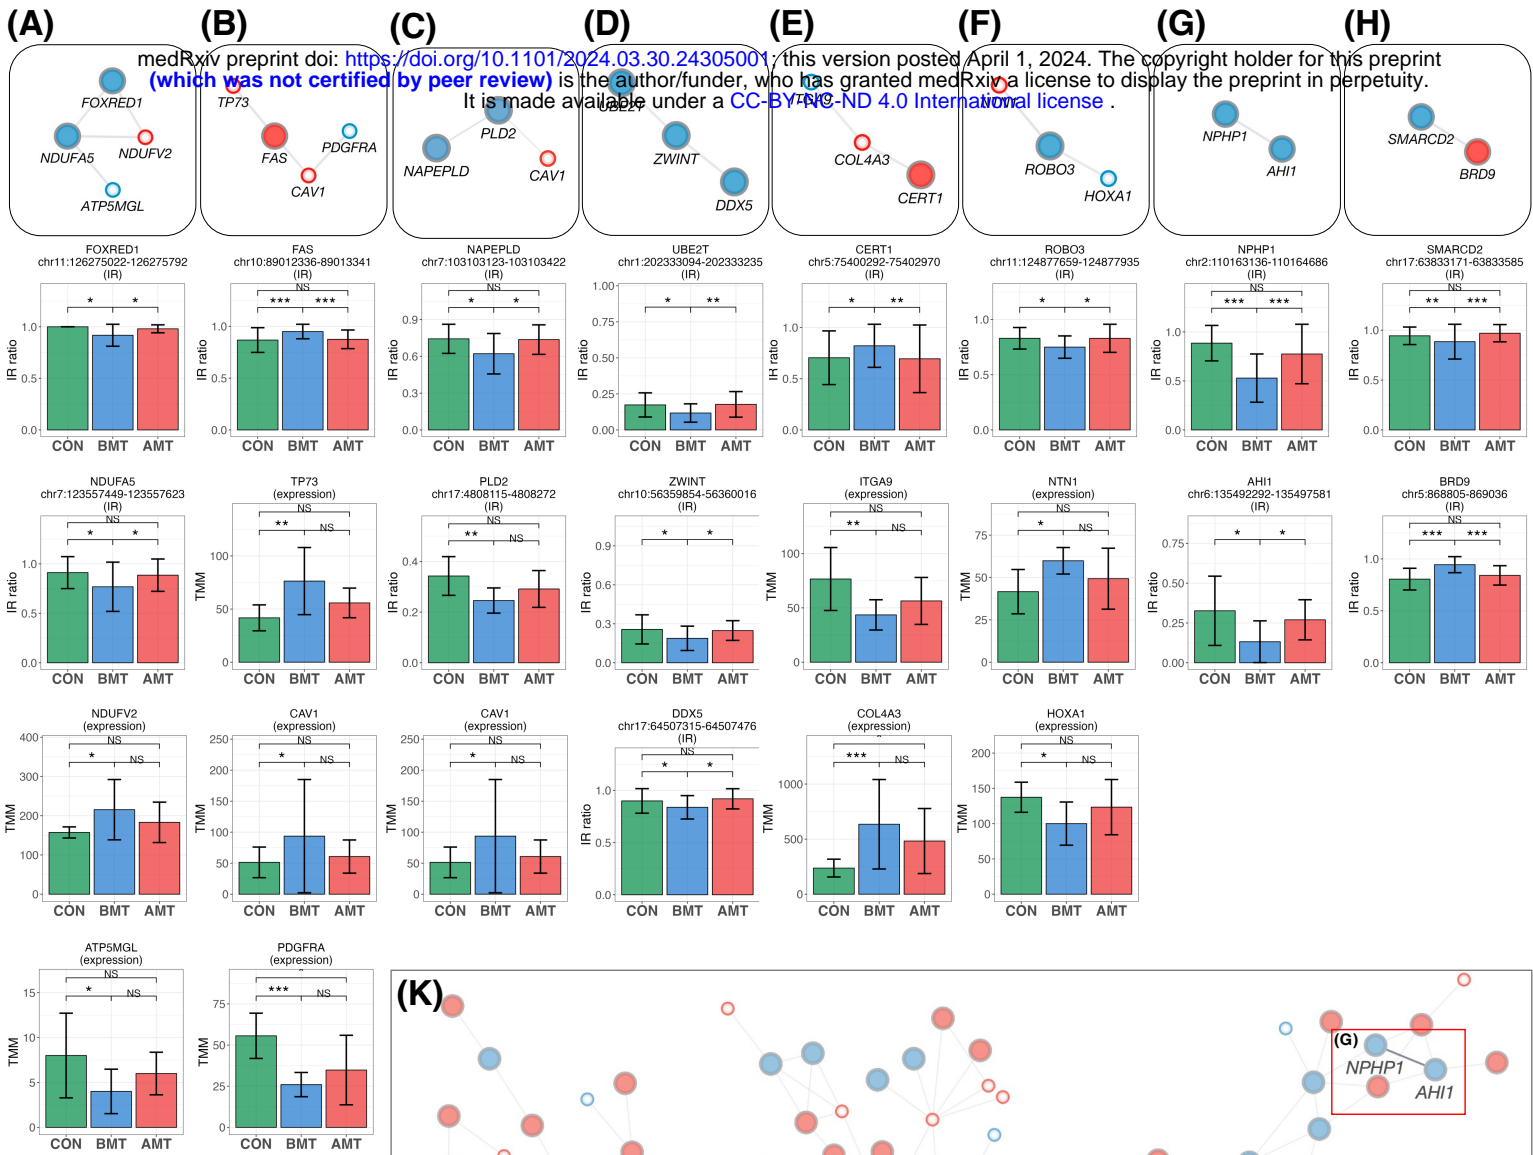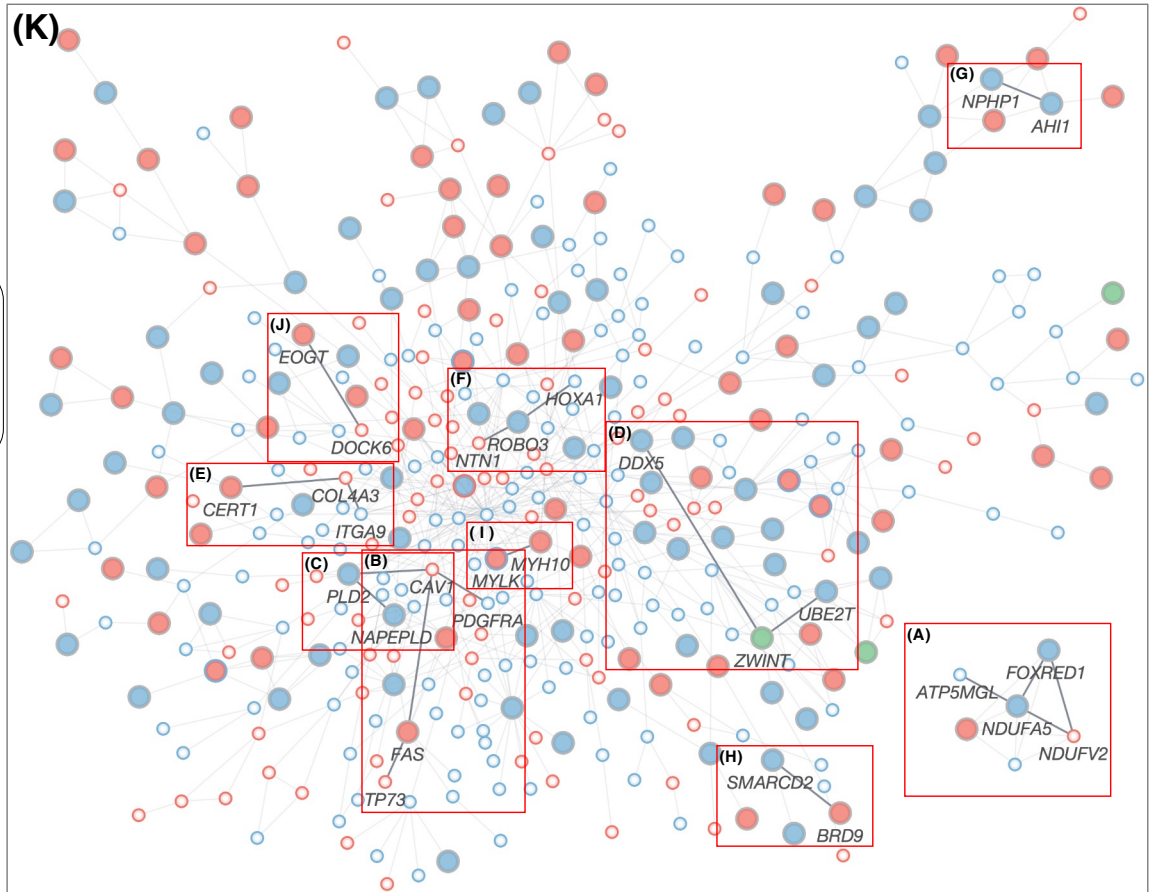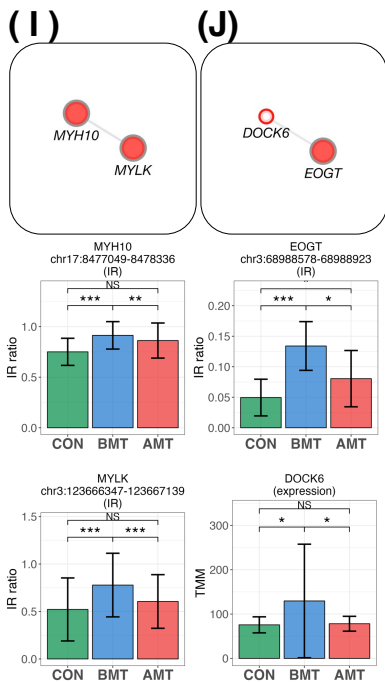

Source: https://medrxiv.org/content/10.1101/2024.03.30.24305001v1.full.pdf
